# Supplementary material for: Palladium-catalyzed synthesis of 2,3-disubstituted indoles via arylation of ortho-alkynylanilines with arylsiloxanes
Source: Royal Society of Chemistry journal article supplement (doi:10.1039/d3ob00961k), 2023-01-01

## Palladium Catalyzed Synthesis of 2,3-Disubstituted Indoles *via* Arylation of *ortho*-Alkynylanilines with Arylsiloxanes

Yang-Ting Hsia,<sup>a</sup> Yu-Lin Lu,<sup>a</sup> Rekha Bai,<sup>a</sup> Satpal Singh Badsara\*<sup>d</sup> and Chin-Fa Lee\*<sup>a,b,c</sup>

<sup>a</sup> Department of Chemistry, National Chung Hsing University, Taichung, Taiwan 402, R.O.C

E-mail: [cfalee@dragon.nchu.edu.tw](mailto:cfalee@dragon.nchu.edu.tw);

<sup>b</sup> *i*-Center for Advanced Science and Technology (*i*CAST), National Chung Hsing University, Taichung City 402, Taiwan, R.O.C.

<sup>c</sup> Innovation and Development Center of Sustainable Agriculture (IDCSA), National Chung Hsing University, Taichung City 402, Taiwan, R.O.C.

<sup>d</sup> MFOS Laboratory, Department of Chemistry, University of Rajasthan, Jaipur, Rajasthan 302004, India.

E-mail: [sattubhu2005@gmail.com](mailto:sattubhu2005@gmail.com)

<sup>1</sup>H, <sup>13</sup>C and <sup>19</sup>F NMR Spectra of products **3**

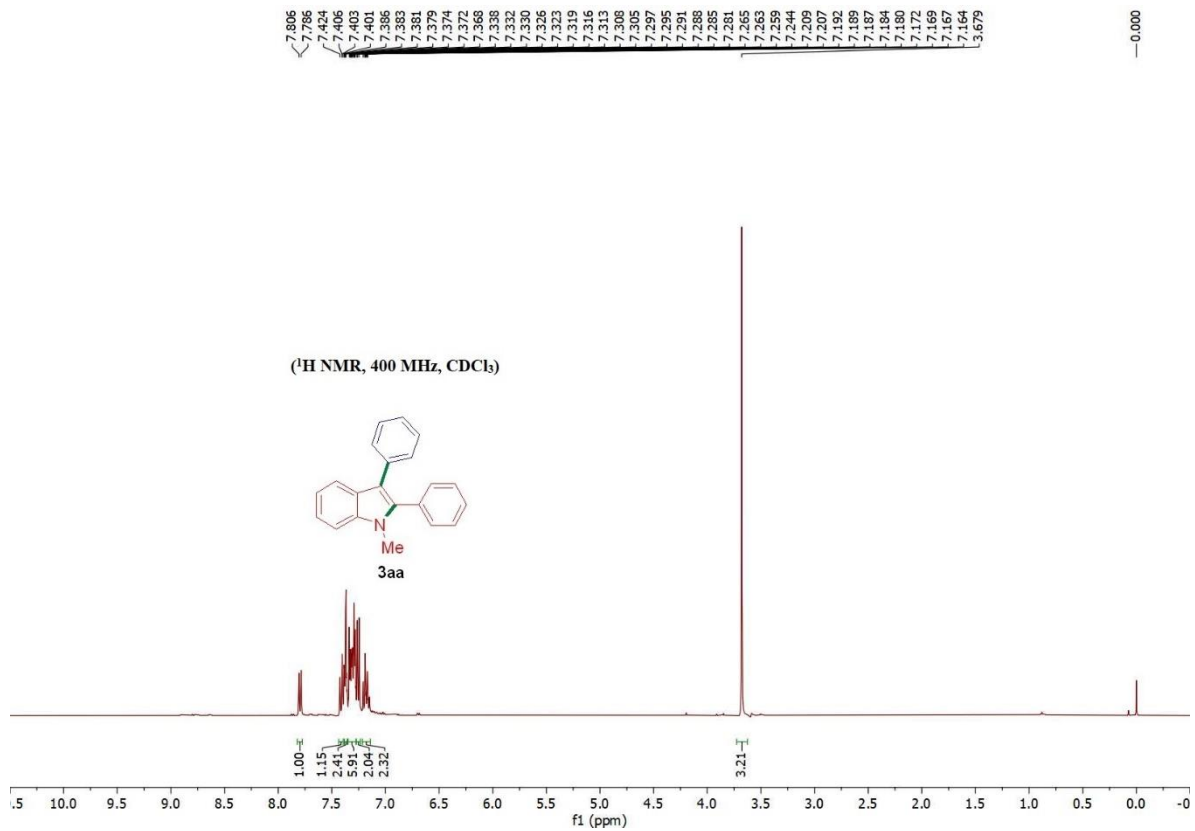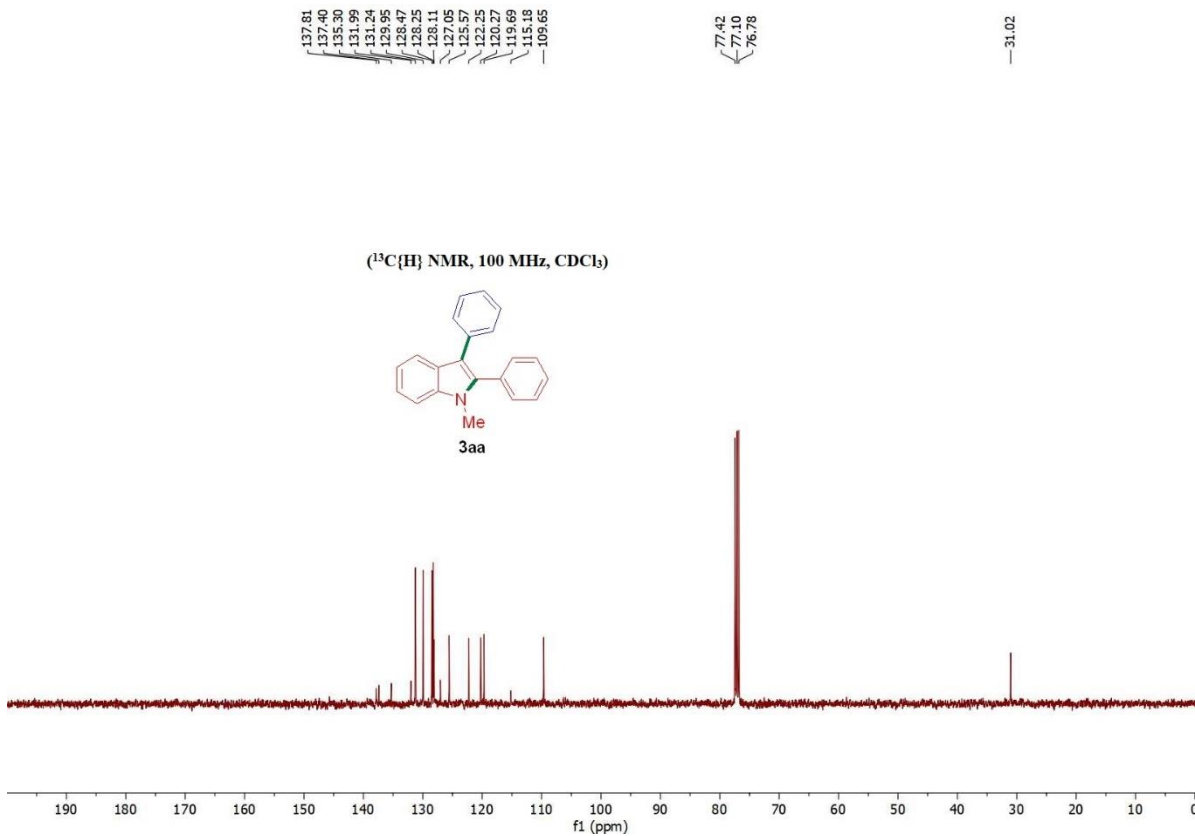

7.804  
7.794  
7.784  
7.774  
7.765  
7.336  
7.306  
7.282  
7.261  
7.240  
7.214  
7.194  
7.175  
7.155  
7.138

—3.645

—2.374

(<sup>1</sup>H NMR, 400 MHz, CDCl<sub>3</sub>)

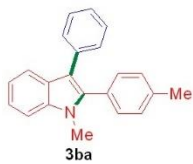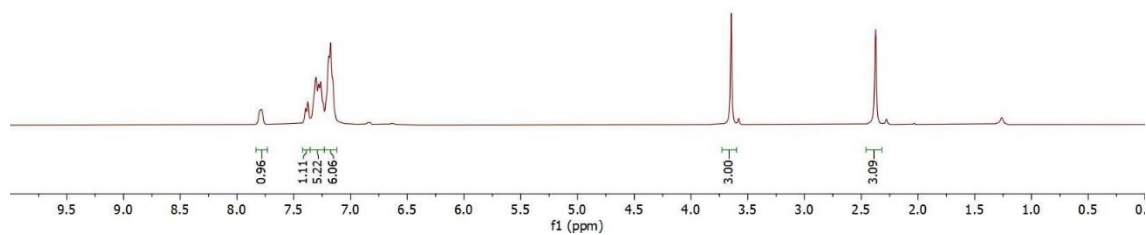

137.90  
137.34  
135.45  
131.06  
129.92  
128.20  
128.91  
128.22  
127.07  
125.48  
122.10  
120.19  
119.58  
114.91  
108.60

77.42  
77.10  
76.78

—30.94

—21.42

(<sup>13</sup>C NMR, 100 MHz, CDCl<sub>3</sub>)

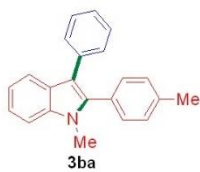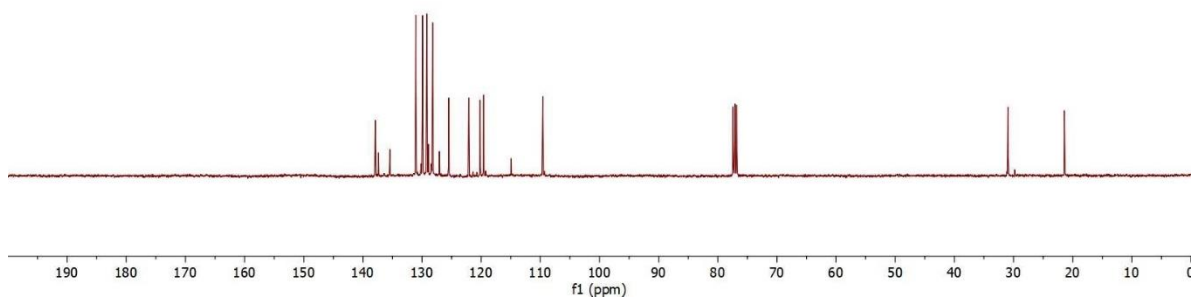

7.797  
7.777  
7.396  
7.375  
7.325  
7.321  
7.303  
7.283  
7.265  
7.243  
7.221  
7.211  
7.192  
7.174  
7.156  
7.140  
6.911  
6.890

3.816  
3.647

0.000

(<sup>1</sup>H NMR, 400 MHz, CDCl<sub>3</sub>)

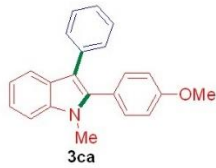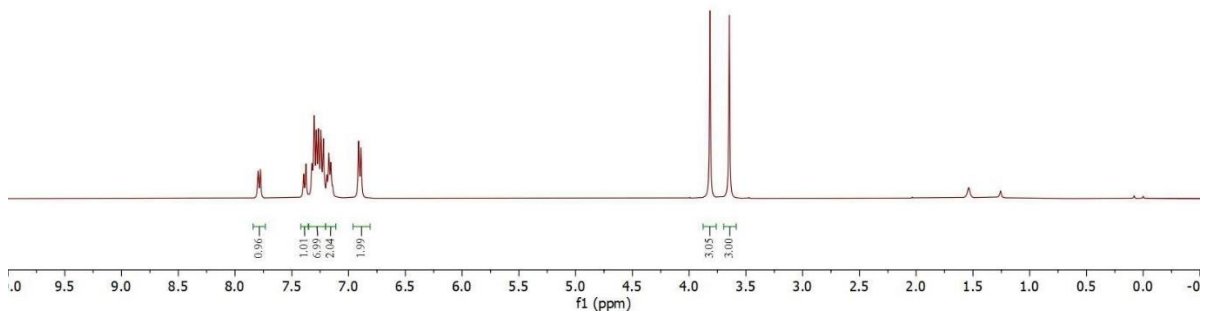

159.45  
137.69  
137.97  
135.46  
135.29  
132.89  
128.94  
127.02  
125.45  
125.13  
122.05  
119.83  
114.80  
113.86  
109.58

77.42  
77.10  
76.78

55.30

30.90

(<sup>13</sup>C NMR, 100 MHz, CDCl<sub>3</sub>)

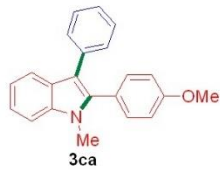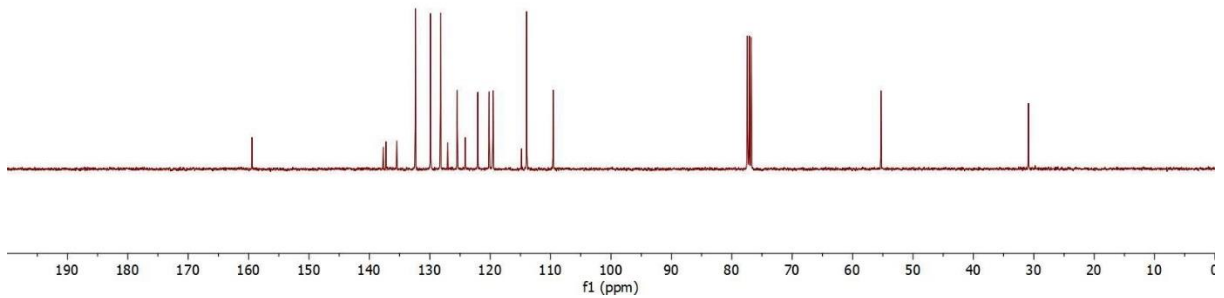

7.808  
7.805  
7.801  
7.789  
7.785  
7.782  
7.405  
7.402  
7.384  
7.381  
7.321  
7.316  
7.305  
7.298  
7.295  
7.290  
7.287  
7.285  
7.279  
7.274  
7.268  
7.264  
7.261  
7.256  
7.241  
7.236  
7.230  
7.225  
7.210  
7.204  
7.195  
7.186  
7.181  
7.175  
7.165  
7.161  
7.155  
3.857  
2.888  
2.886  
2.880  
2.834  
2.659  
2.614  
1.668  
1.662  
1.653  
1.649  
1.644  
1.638  
1.630  
1.624  
1.617  
1.610  
1.605  
1.600  
1.591  
1.586  
1.406  
1.401  
1.387  
1.382  
1.369  
1.363  
1.350  
1.345  
0.980  
0.948  
0.942  
0.929  
0.924  
0.000

(<sup>1</sup>H NMR, 400 MHz, CDCl<sub>3</sub>)

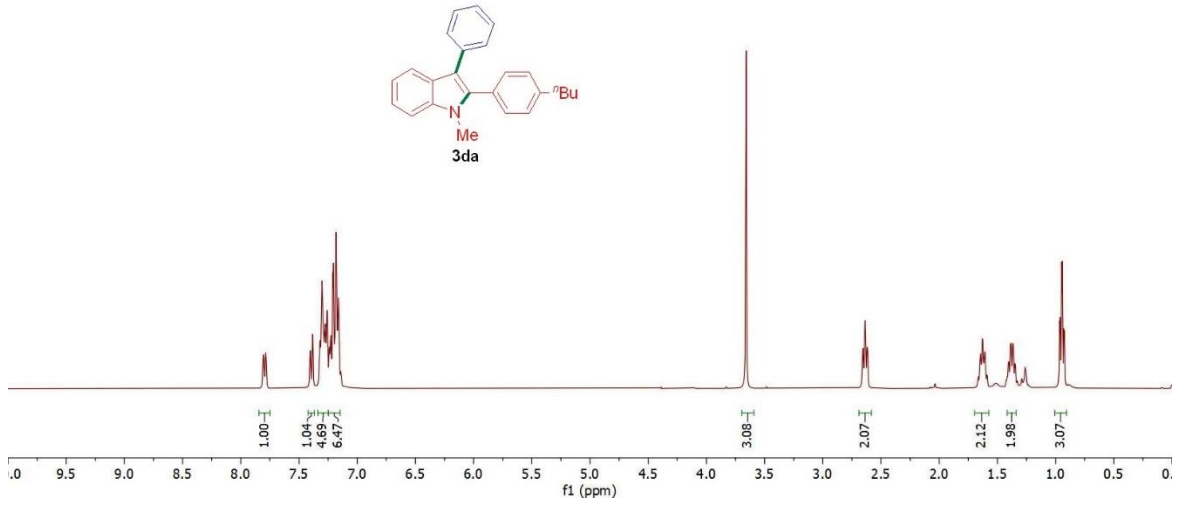

142.88  
138.00  
137.32  
135.45  
131.03  
129.91  
129.06  
128.48  
128.19  
127.04  
125.44  
122.07  
120.17  
119.57  
114.87  
109.60  
77.41  
77.10  
76.78  
35.53  
33.50  
30.98  
22.48  
14.07

(<sup>13</sup>C NMR, 100 MHz, CDCl<sub>3</sub>)

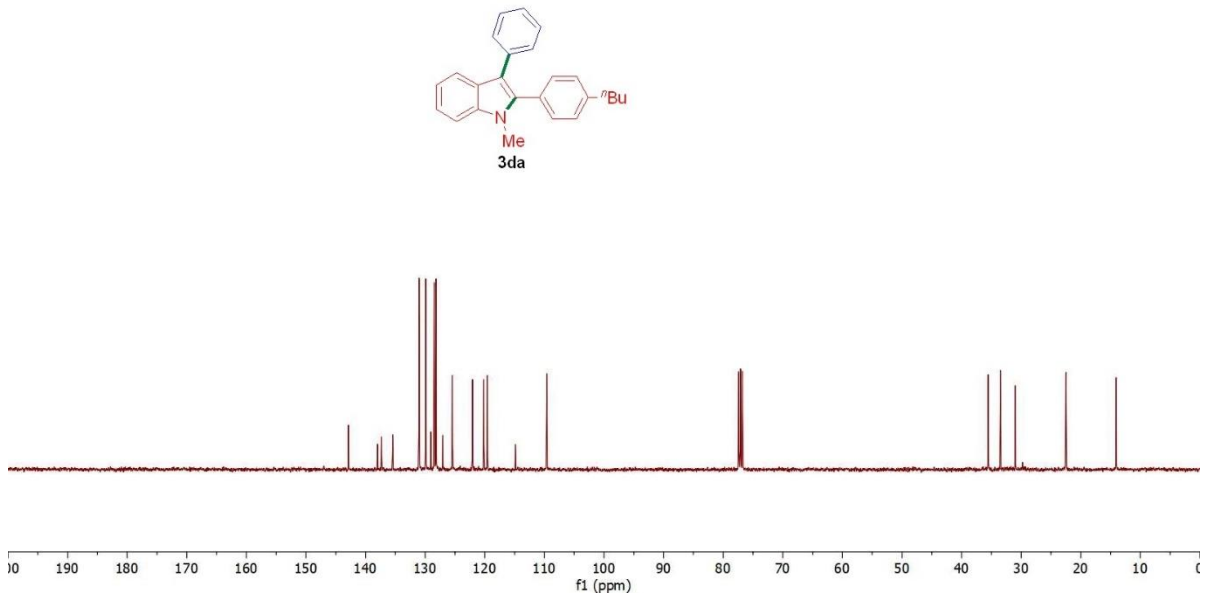

7.794  
7.792  
7.790  
7.774  
7.772  
7.770  
7.419  
7.416  
7.414  
7.398  
7.396  
7.393  
7.379  
7.376  
7.317  
7.308  
7.305  
7.296  
7.281  
7.288  
7.285  
7.280  
7.282  
7.274  
7.272  
7.267  
7.264  
7.259  
7.254  
7.251  
7.238  
7.210  
7.207  
7.202  
7.193  
7.190  
7.187  
7.184  
7.180  
7.176  
7.172  
7.170  
7.167  
7.159  
7.105  
7.098  
7.092  
7.083  
7.081  
7.076  
7.071  
7.068  
7.059  
7.054  
7.047  
3.659

-0.000

(<sup>1</sup>H NMR, 400 MHz, CDCl<sub>3</sub>)

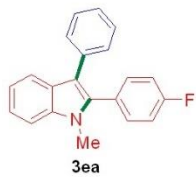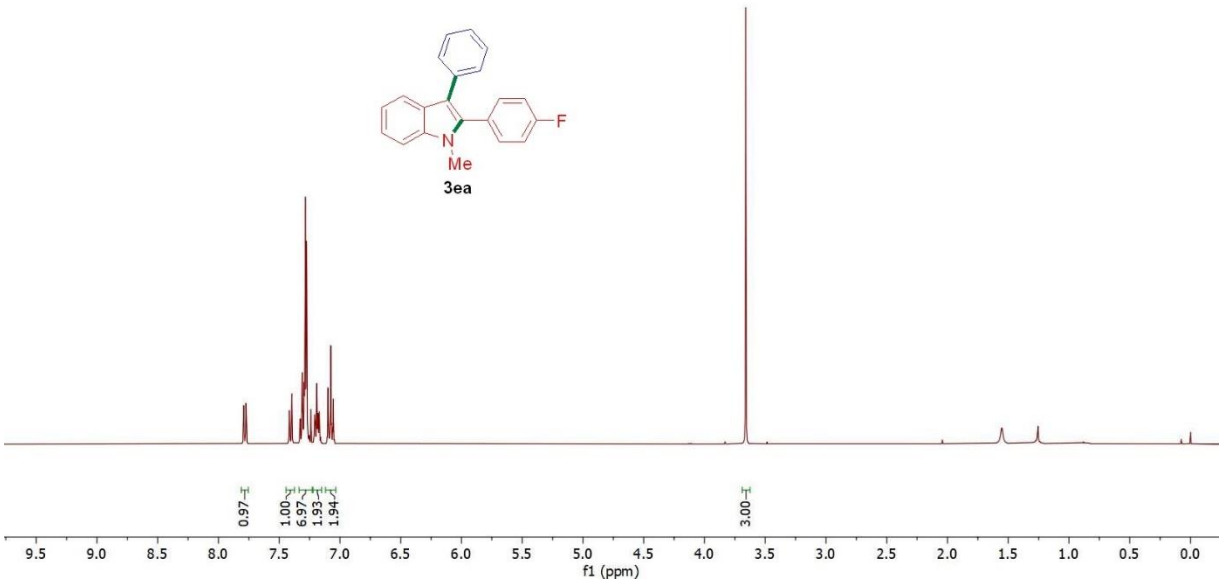

163.88  
161.42  
137.36  
136.64  
135.08  
132.99  
132.91  
129.92  
128.33  
127.99  
126.95  
125.72  
122.41  
120.37  
119.71  
115.76  
115.55  
115.44  
109.66

77.42  
77.10  
76.78

30.96

(<sup>13</sup>C NMR, 100 MHz, CDCl<sub>3</sub>)

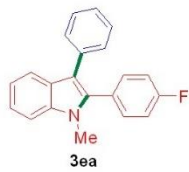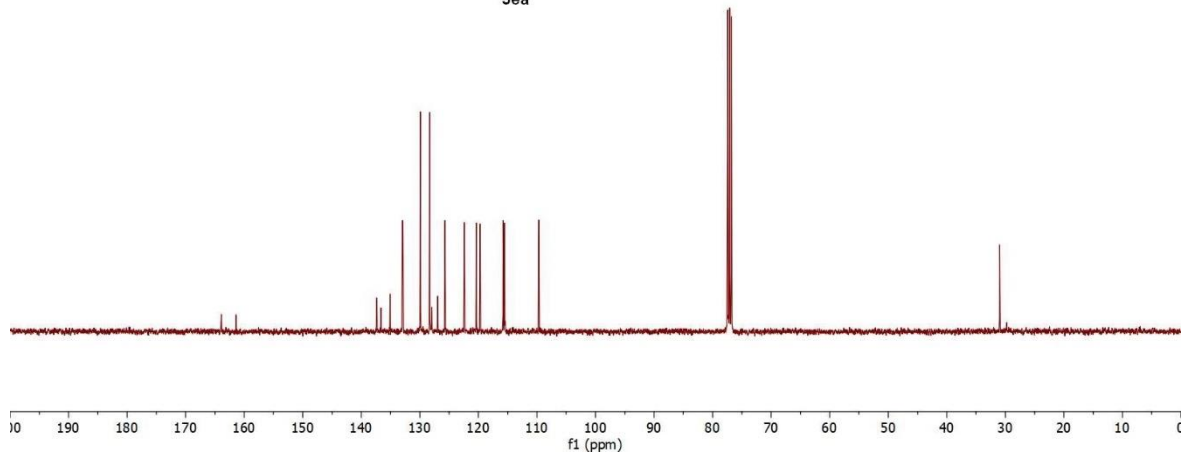

-117.148

(<sup>19</sup>F NMR, 376 MHz, CDCl<sub>3</sub>)

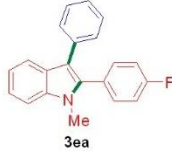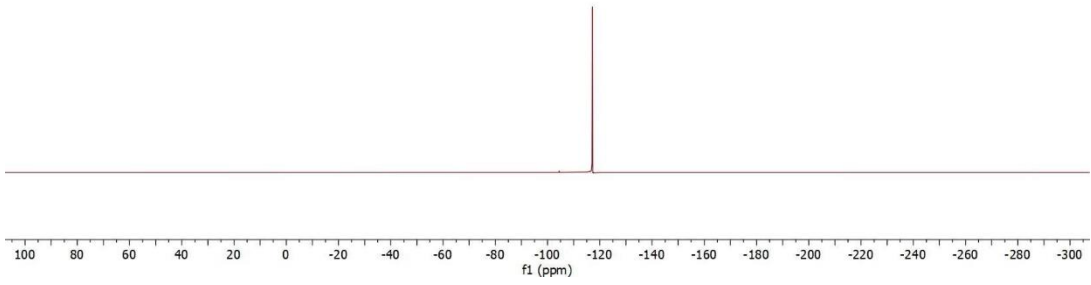

7.784  
7.764  
7.409  
7.389  
7.355  
7.350  
7.339  
7.334  
7.327  
7.324  
7.310  
7.306  
7.286  
7.275  
7.254  
7.248  
7.237  
7.233  
7.218  
7.207  
7.204  
7.197  
7.186  
7.175  
7.169  
7.166

3.655

-0.000

(<sup>1</sup>H NMR, 400 MHz, CDCl<sub>3</sub>)

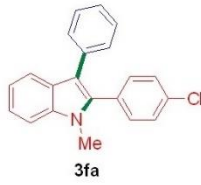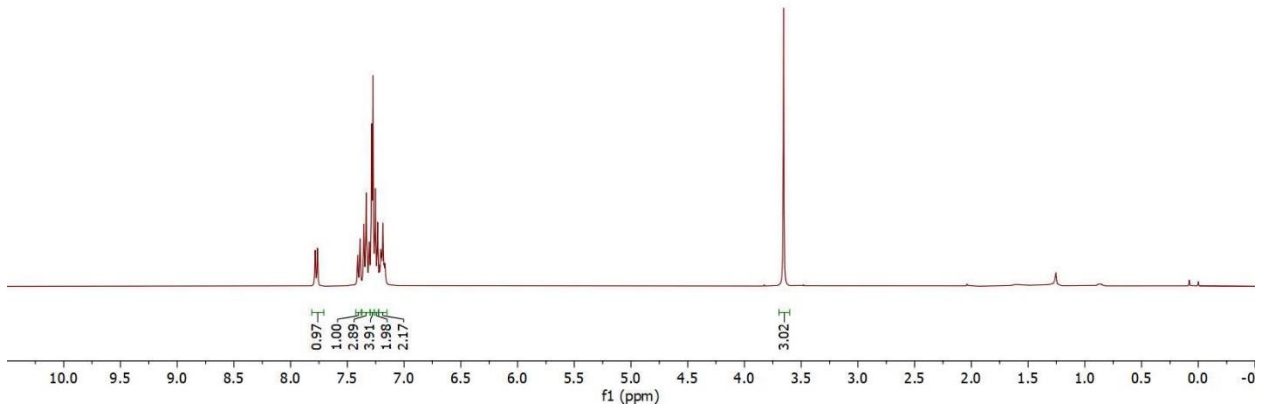

137.49  
136.36  
134.93  
134.20  
132.47  
130.41  
129.94  
128.81  
126.97  
125.81  
122.53  
120.42  
119.75  
115.62  
109.69

77.42  
77.10  
76.78

31.03

(<sup>13</sup>C NMR, 100 MHz, CDCl<sub>3</sub>)

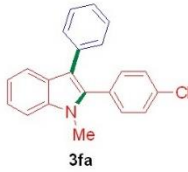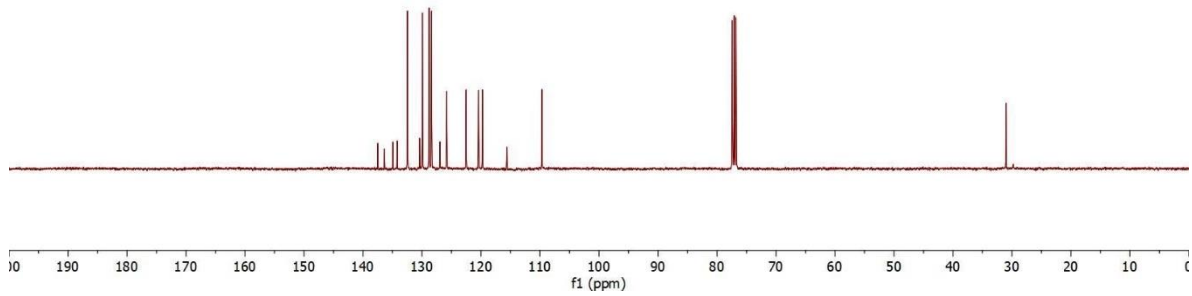

7.782  
7.762  
7.754  
7.493  
7.413  
7.392  
7.331  
7.328  
7.313  
7.310  
7.307  
7.291  
7.287  
7.278  
7.266  
7.231  
7.214  
7.206  
7.196  
7.191  
7.187  
7.180  
7.175  
7.169

3.663

0.000

(<sup>1</sup>H NMR, 400 MHz, CDCl<sub>3</sub>)

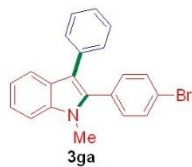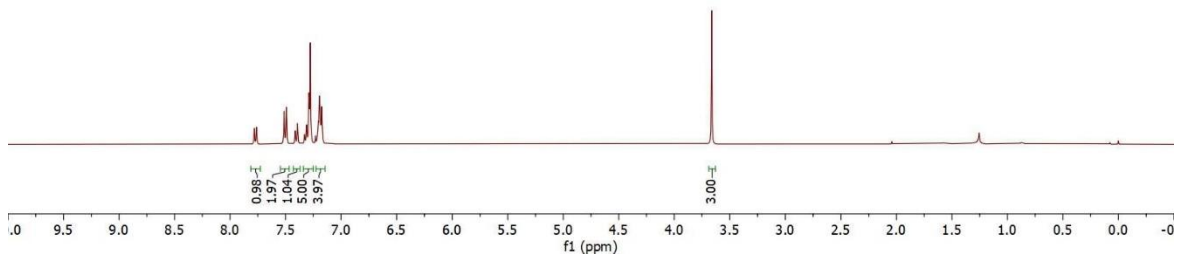



137.51  
136.35  
134.90  
132.75  
131.75  
130.89  
129.95  
128.41  
126.99  
125.83  
122.95  
122.47  
120.43  
119.76  
115.63  
109.70

77.42  
77.10  
76.78

31.06

(<sup>13</sup>C NMR, 100 MHz, CDCl<sub>3</sub>)

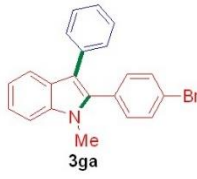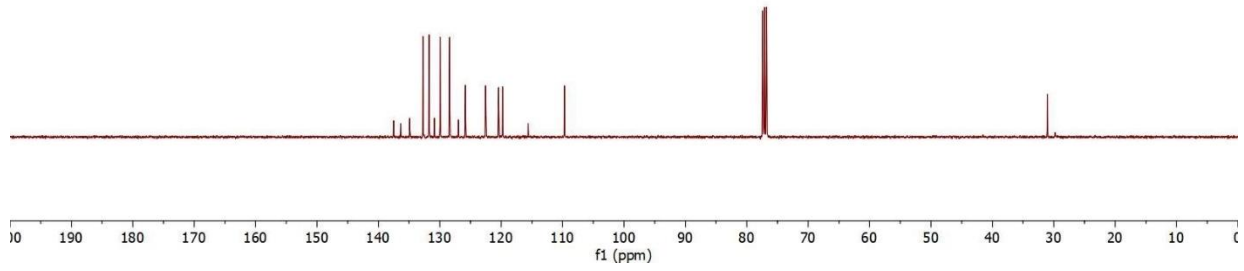

8.238  
8.216  
7.770  
7.750  
7.504  
7.498  
7.493  
7.471  
7.476  
7.453  
7.432  
7.378  
7.375  
7.361  
7.348  
7.346  
7.340  
7.337  
7.326  
7.322  
7.318  
7.308  
7.304  
7.297  
7.287  
7.280  
7.243  
7.235  
7.215

3.730

0.000

(<sup>1</sup>H NMR, 400 MHz, CDCl<sub>3</sub>)

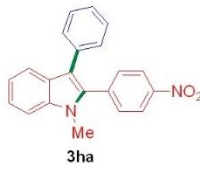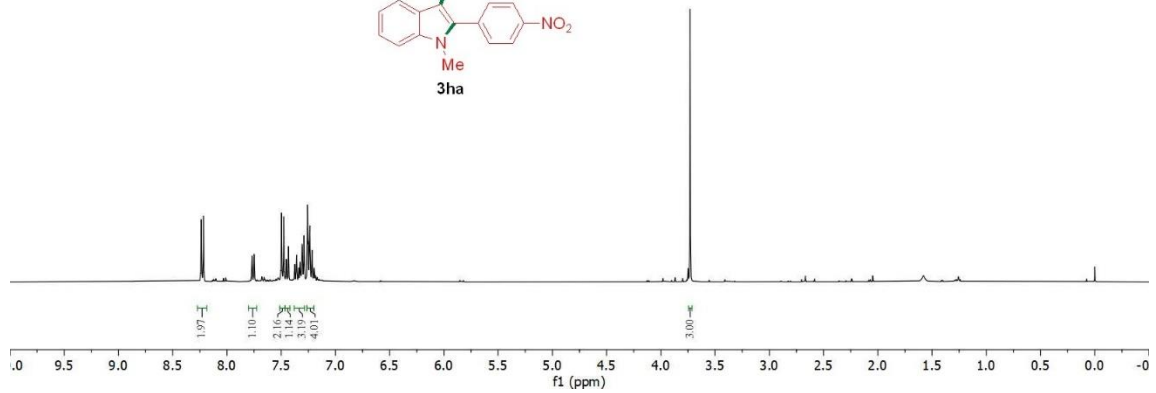

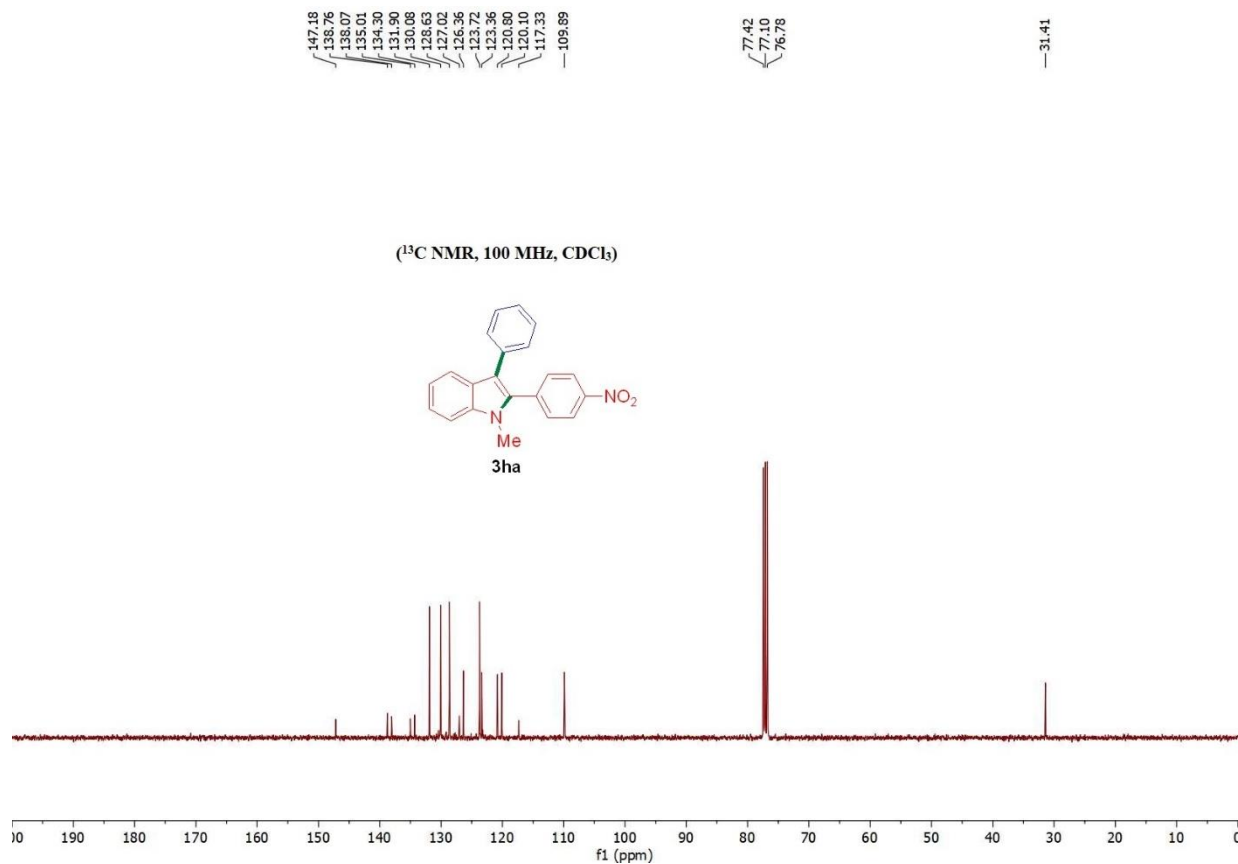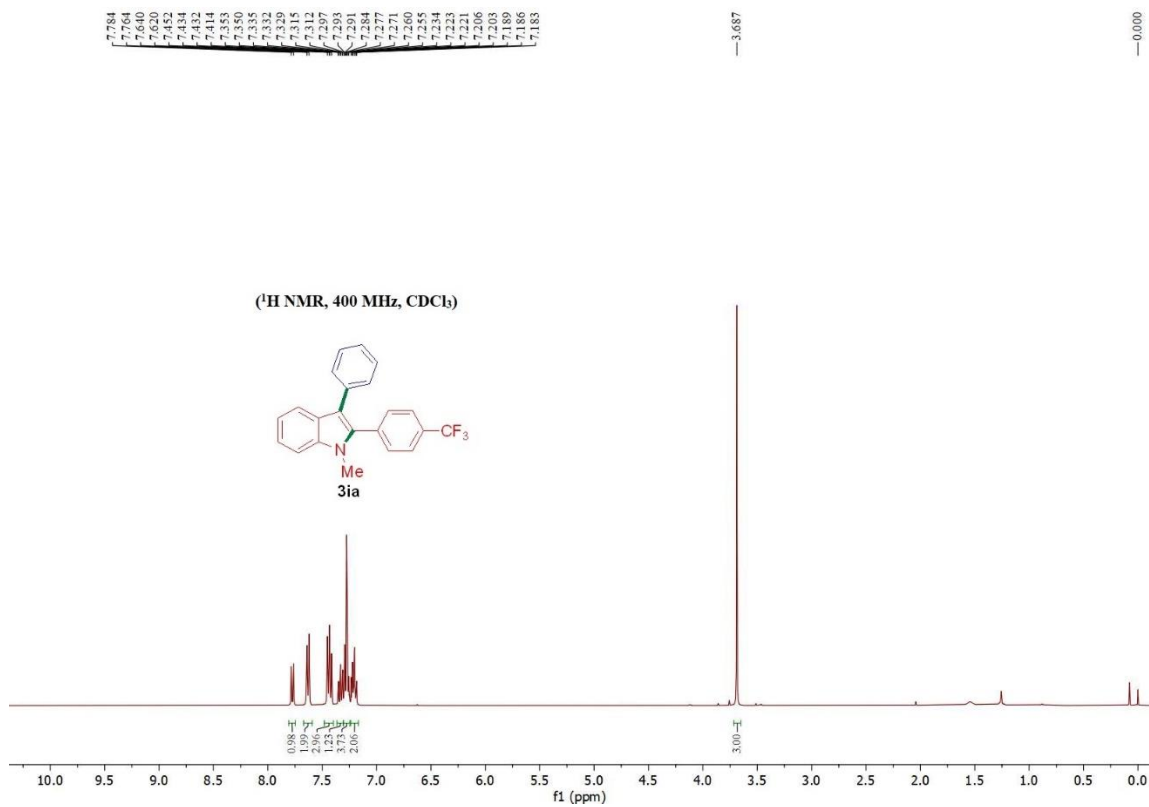

137.72  
135.97  
135.75  
134.68  
131.51  
130.03  
128.48  
127.03  
126.02  
125.49  
125.45  
125.42  
125.37  
122.86  
120.58  
119.93  
116.32  
109.78

77.42  
77.10  
76.78

31.19

(<sup>13</sup>C NMR, 100 MHz, CDCl<sub>3</sub>)

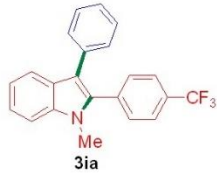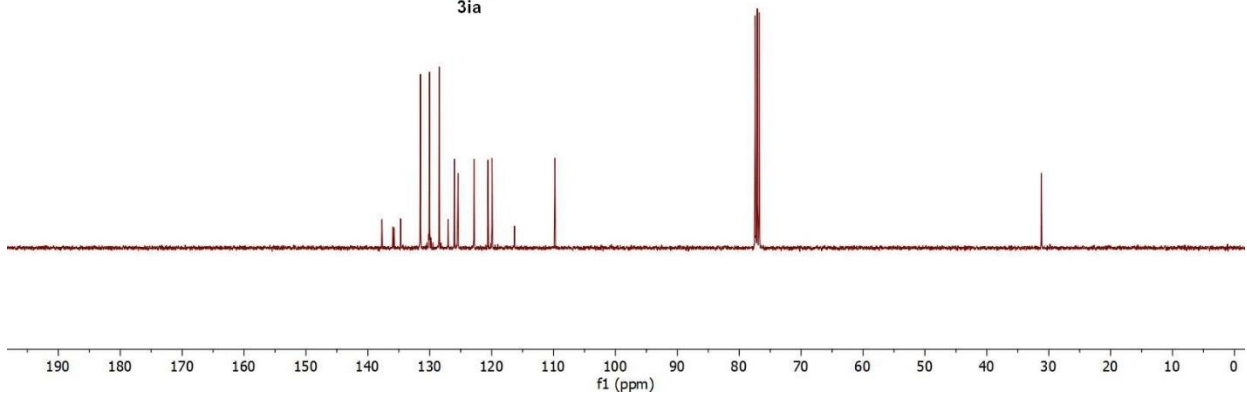

62.424

(<sup>19</sup>F NMR, 376 MHz, CDCl<sub>3</sub>)

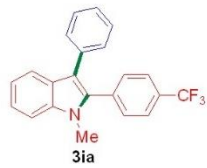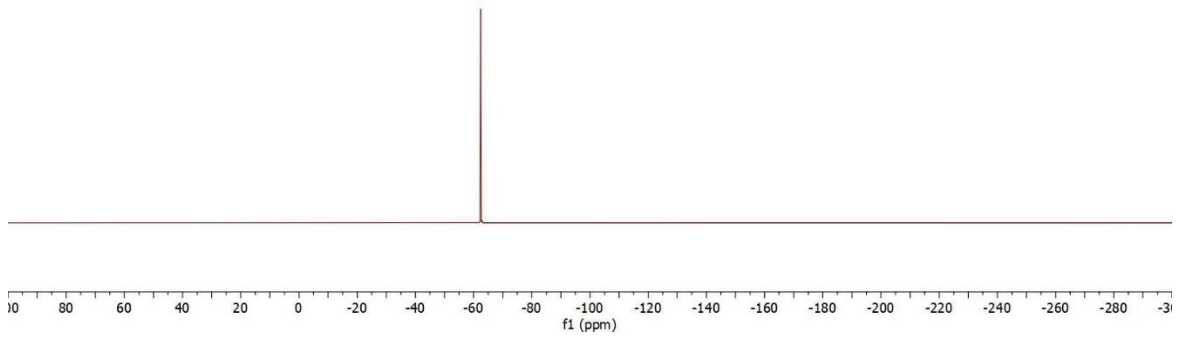

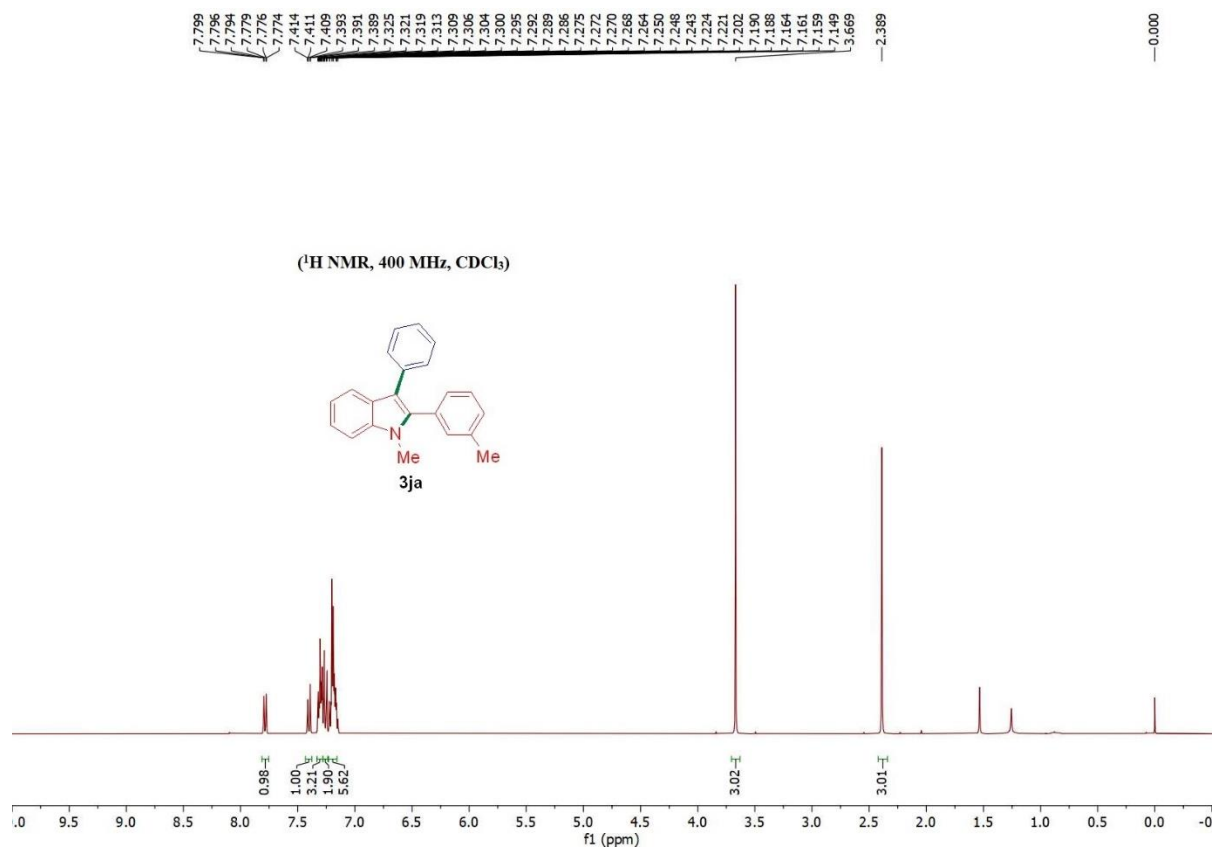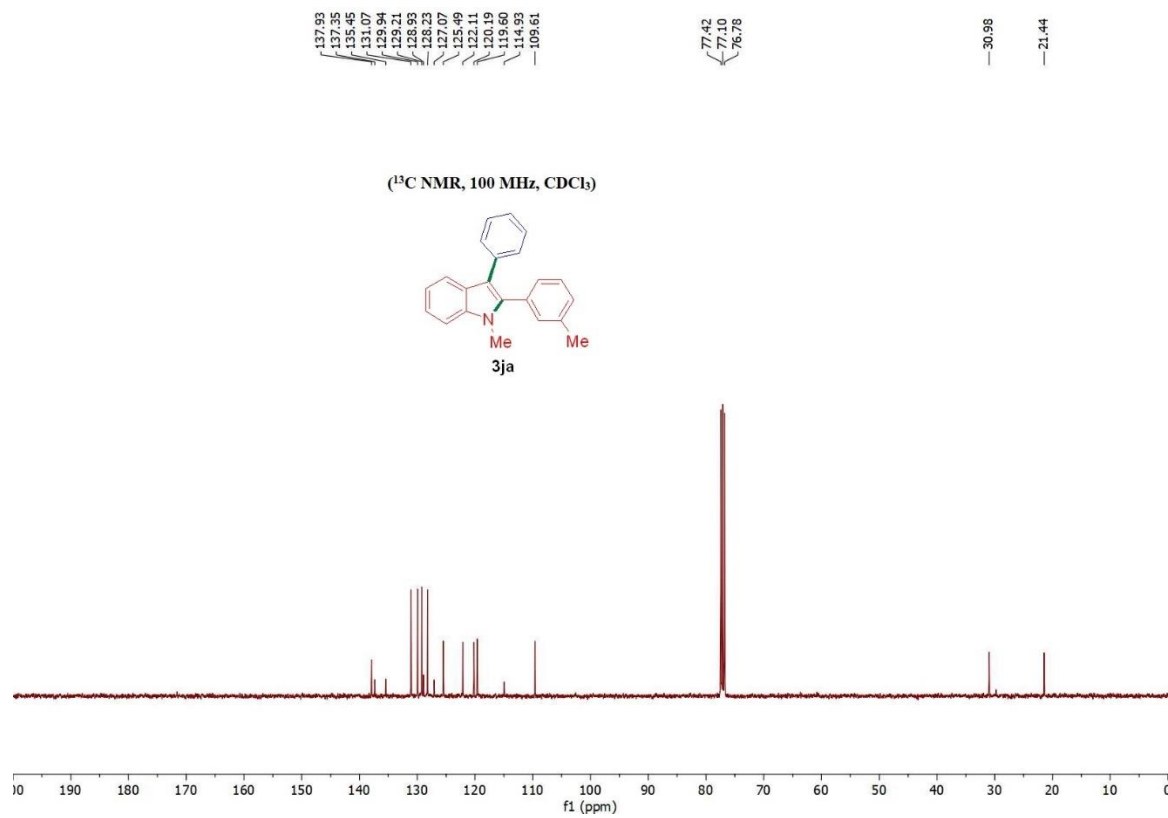

7.877  
7.857  
7.421  
7.400  
7.339  
7.335  
7.326  
7.323  
7.320  
7.316  
7.308  
7.305  
7.300  
7.297  
7.292  
7.279  
7.276  
7.259  
7.256  
7.253  
7.250  
7.243  
7.238  
7.236  
7.234  
7.231  
7.228  
7.224  
7.222  
7.215  
7.207  
7.204  
7.202  
7.187  
7.184  
7.150  
7.147  
7.143  
7.134  
7.129  
7.123  
7.114  
7.110  
7.107  
3.520  
2.008

-0.000

(<sup>1</sup>H NMR, 400 MHz, CDCl<sub>3</sub>)

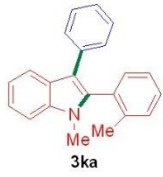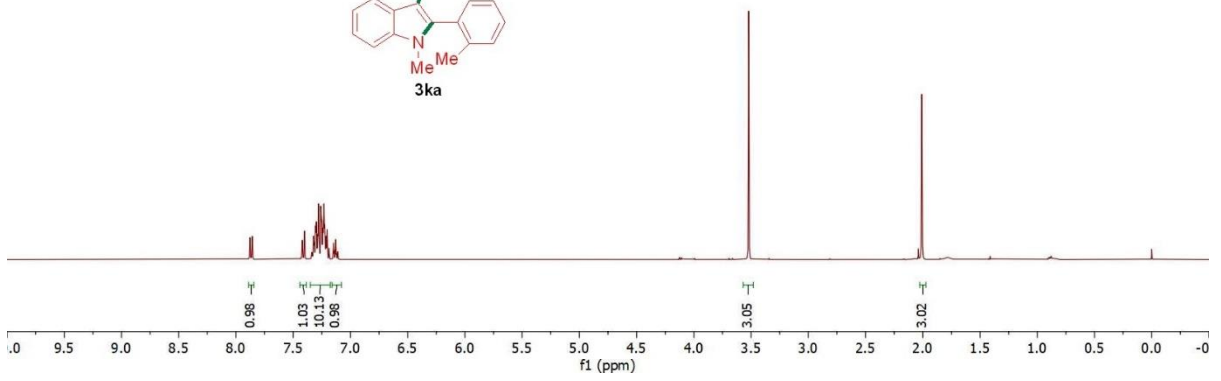

136.69  
137.25  
137.15  
135.53  
131.82  
131.74  
130.24  
128.03  
128.86  
126.25  
126.83  
125.82  
125.44  
121.93  
120.12  
119.68  
115.03  
109.55

77.42  
77.10  
76.78

30.35

19.91

(<sup>13</sup>C NMR, 100 MHz, CDCl<sub>3</sub>)

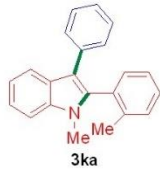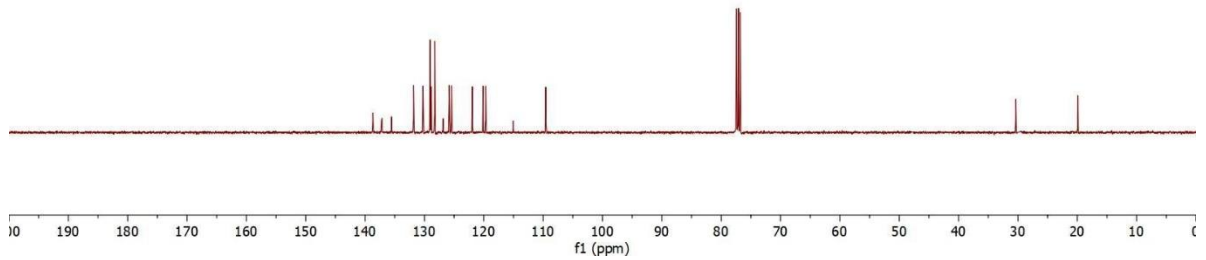

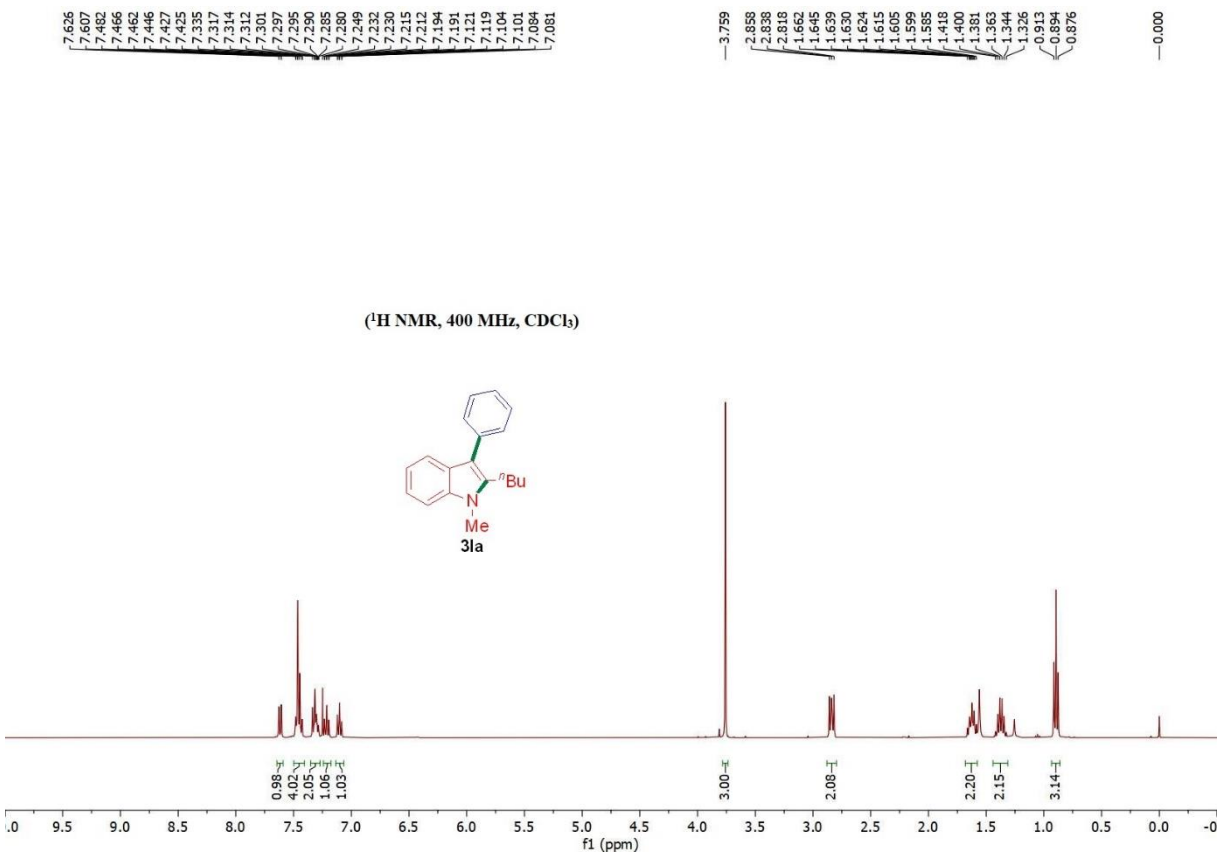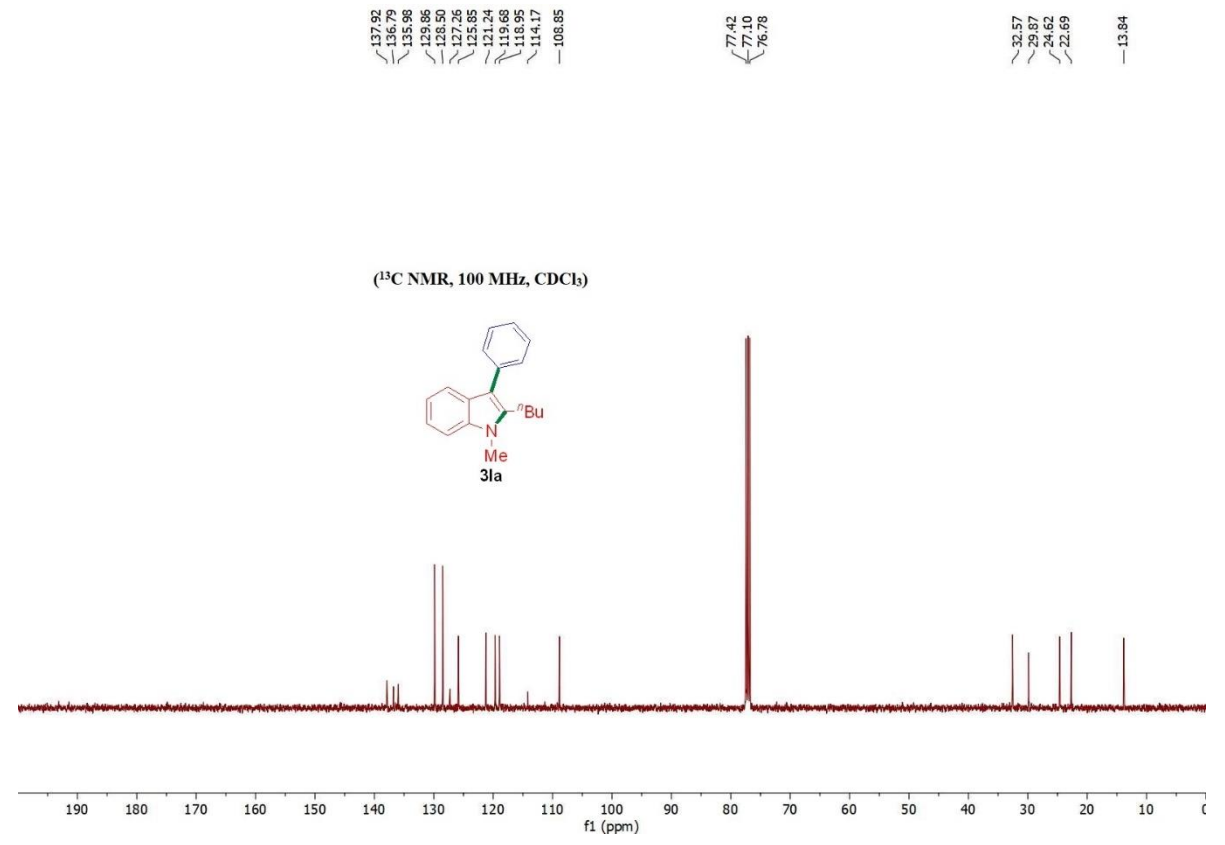

7.772  
7.752  
7.385  
7.365  
7.338  
7.333  
7.326  
7.321  
7.316  
7.313  
7.309  
7.300  
7.293  
7.291  
7.286  
7.283  
7.280  
7.275  
7.273  
7.271  
7.265  
7.262  
7.212  
7.209  
7.207  
7.205  
7.202  
7.197  
7.196  
7.190  
7.186  
7.183  
7.168  
7.165  
7.163  
7.148  
7.145  
7.011  
6.999  
6.996  
3.693

—0.000

(<sup>1</sup>H NMR, 400 MHz, CDCl<sub>3</sub>)

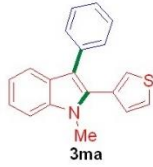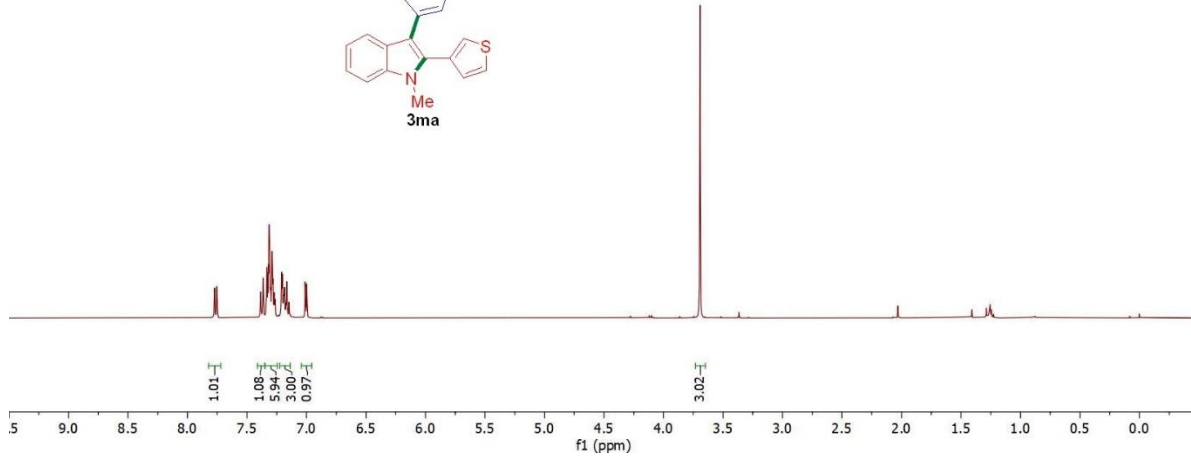

137.33  
135.31  
132.73  
132.00  
129.79  
129.65  
128.28  
126.93  
126.01  
125.73  
125.64  
122.31  
120.24  
119.61  
115.65  
109.58

77.42  
77.10  
76.78

—30.94

(<sup>13</sup>C NMR, 100 MHz, CDCl<sub>3</sub>)

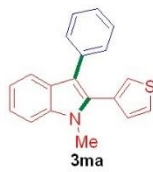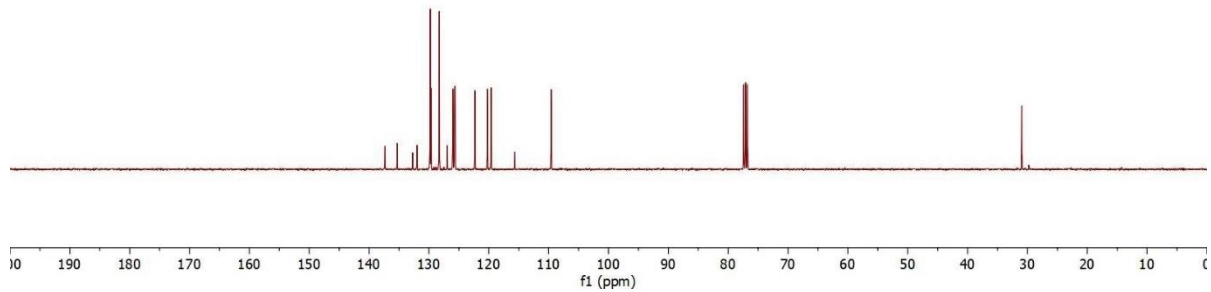

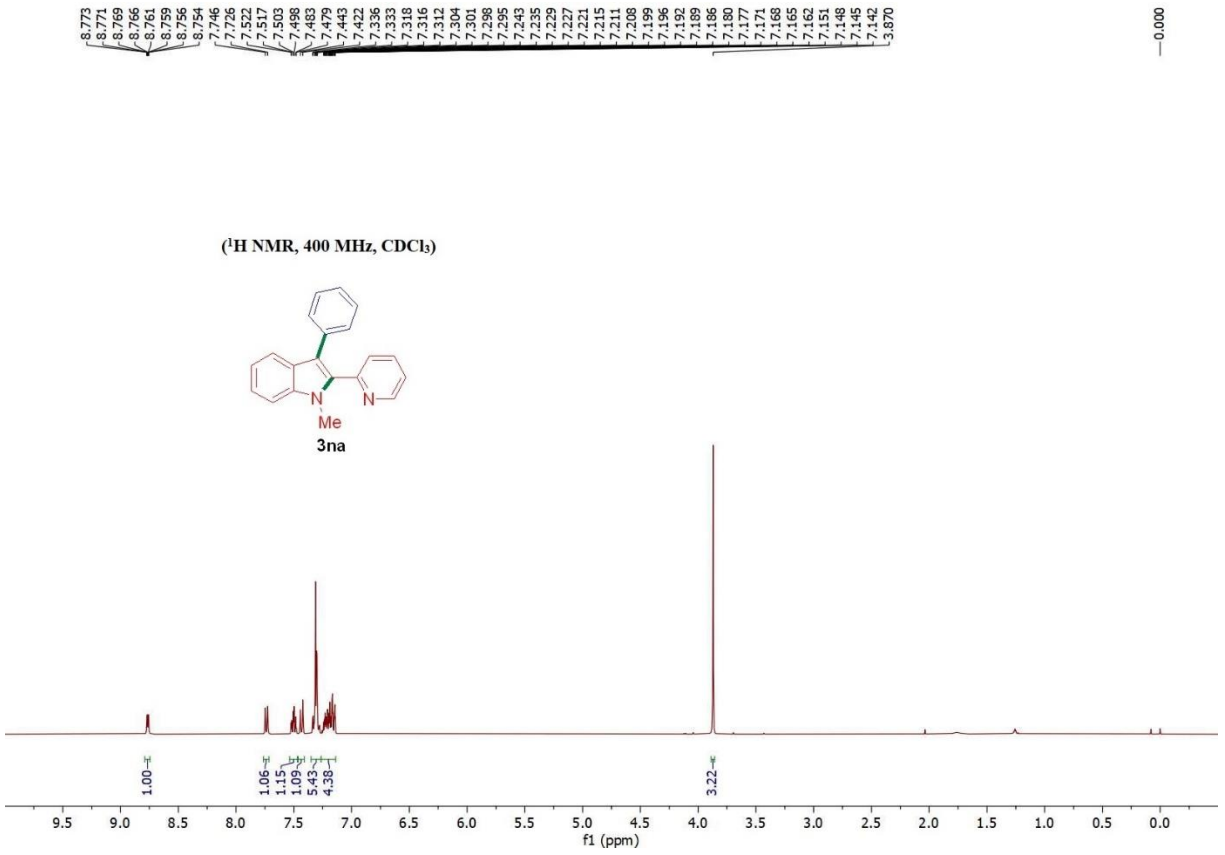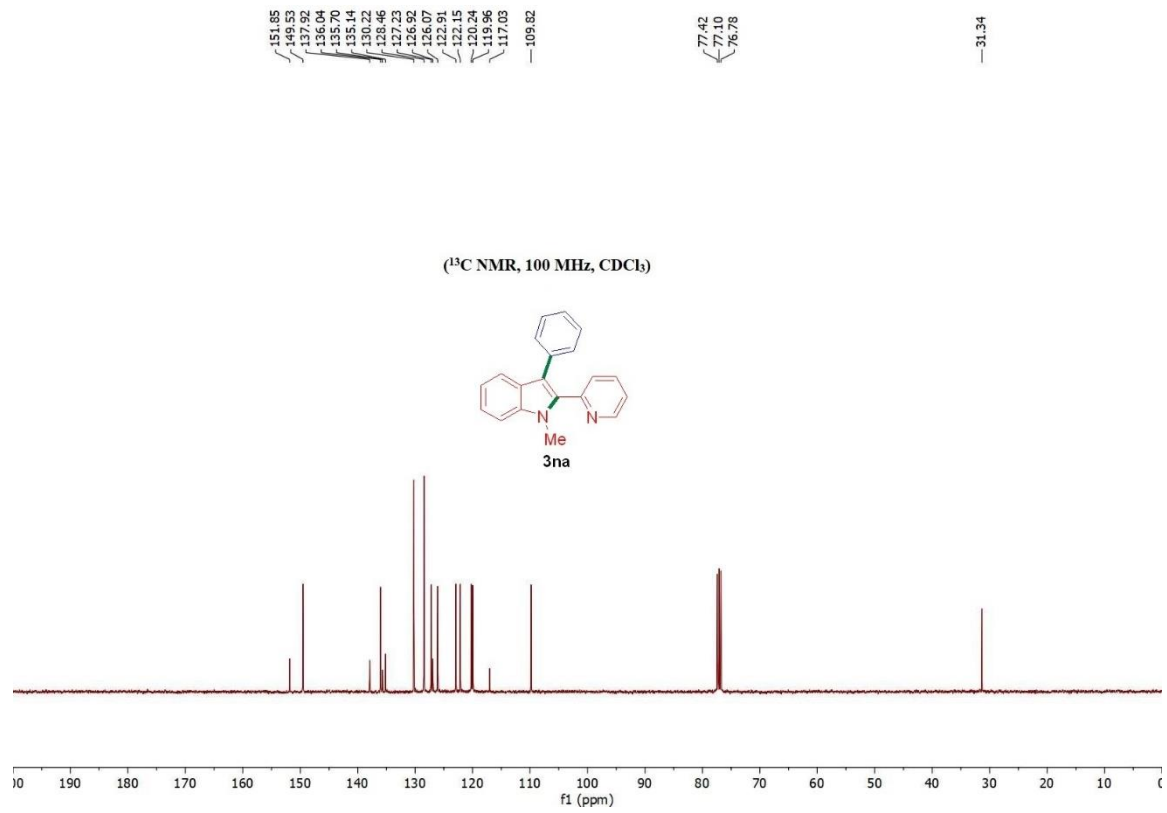



7.796  
7.776  
7.407  
7.387  
7.377  
7.361  
7.334  
7.327  
7.312  
7.293  
7.273  
7.217  
7.204  
7.185  
7.176  
7.158  
7.085  
7.066

3.658

2.317

0.000

(<sup>1</sup>H NMR, 400 MHz, CDCl<sub>3</sub>)

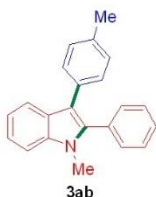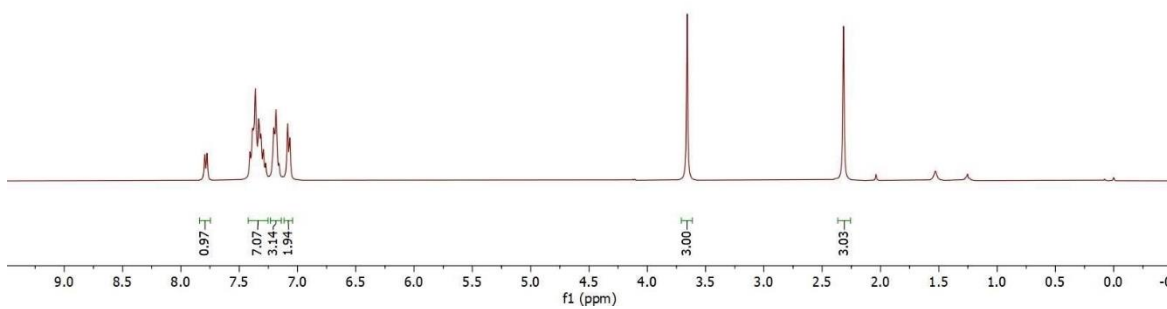

137.57  
137.35  
135.05  
132.22  
132.09  
131.22  
129.76  
129.01  
128.44  
128.02  
127.08  
122.17  
120.15  
119.74  
115.03  
109.60

77.42  
77.10  
76.78

30.99

21.24

(<sup>13</sup>C NMR, 100 MHz, CDCl<sub>3</sub>)

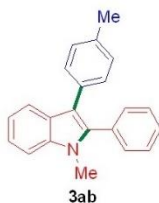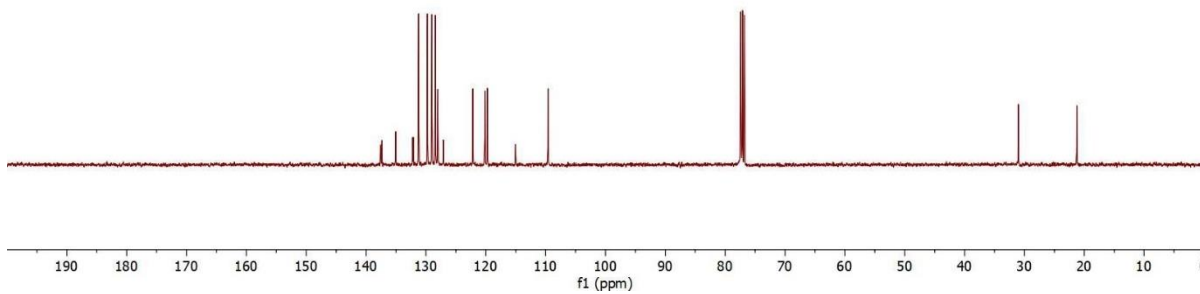

7.765  
7.745  
7.415  
7.395  
7.392  
7.390  
7.386  
7.383  
7.374  
7.372  
7.367  
7.362  
7.334  
7.328  
7.315  
7.312  
7.295  
7.277  
7.274  
7.246  
7.229  
7.224  
7.213  
7.208  
7.200  
7.197  
7.194  
7.179  
7.177  
7.174  
7.159  
7.156  
6.837  
6.815  
3.789  
3.671

—0.000

(<sup>1</sup>H NMR, 400 MHz, CDCl<sub>3</sub>)

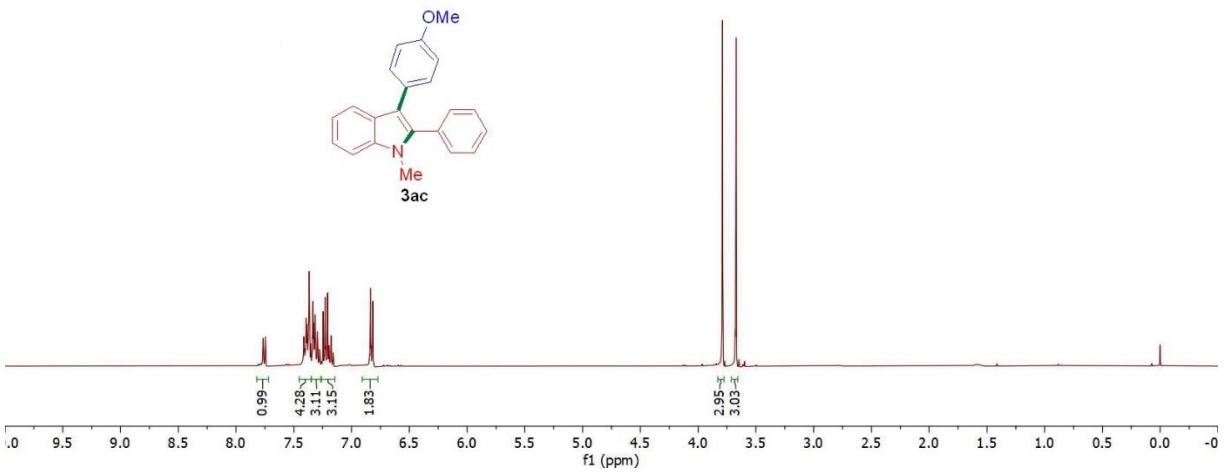

157.65  
137.43  
132.11  
131.24  
130.95  
128.45  
127.99  
127.66  
127.21  
122.17  
120.11  
119.67  
114.80  
113.78  
109.59  
77.42  
77.10  
76.78  
55.24  
31.02

(<sup>13</sup>C NMR, 100 MHz, CDCl<sub>3</sub>)

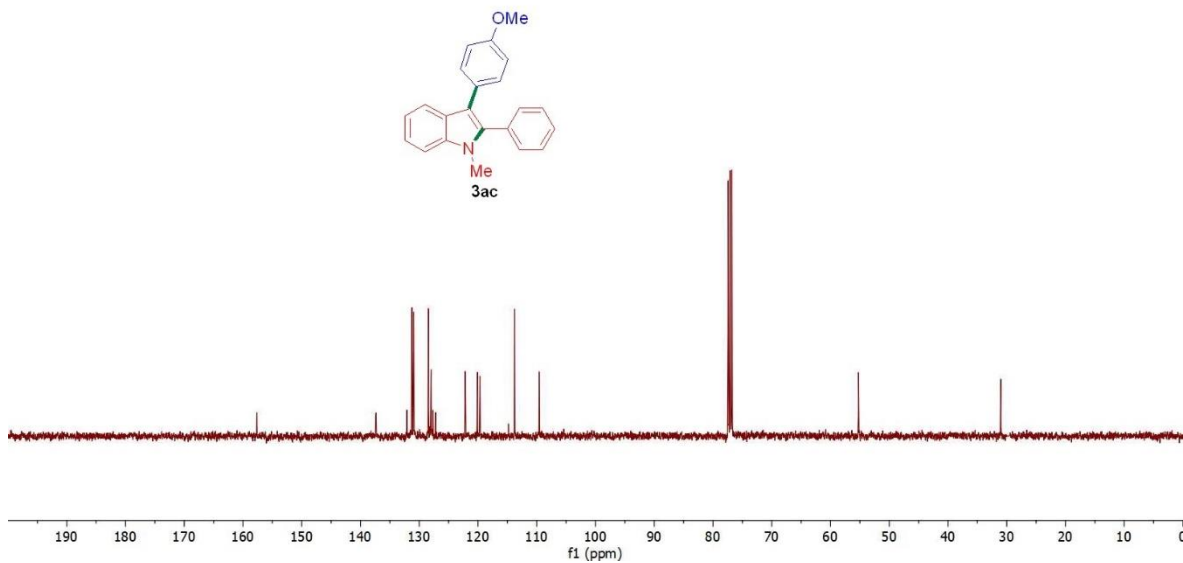

7.739  
7.719  
7.719  
7.398  
7.386  
7.381  
7.373  
7.368  
7.360  
7.326  
7.323  
7.311  
7.305  
7.299  
7.292  
7.287  
7.255  
7.250  
7.241  
7.233  
7.228  
7.210  
7.198  
7.190  
7.171  
6.975  
6.953  
6.931  
-3.666

-0.000

(<sup>1</sup>H NMR, 400 MHz, CDCl<sub>3</sub>)

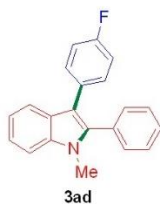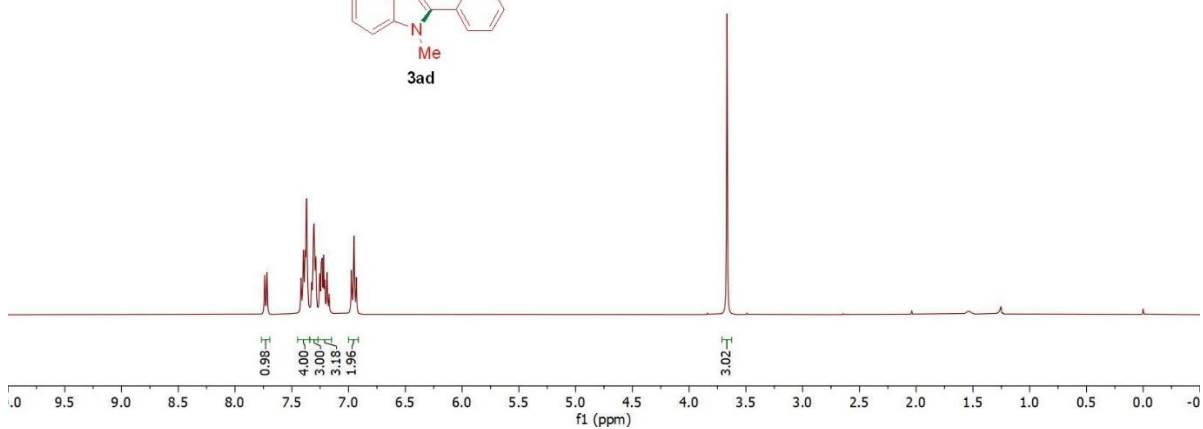

162.36  
159.93

137.79  
137.29  
131.74  
131.34  
131.26  
131.22  
131.16  
128.53  
128.20  
126.96  
122.33  
120.34  
119.38  
115.28  
115.07  
114.15  
109.70

77.42  
77.10  
76.78

31.01

(<sup>13</sup>C NMR, 100 MHz, CDCl<sub>3</sub>)

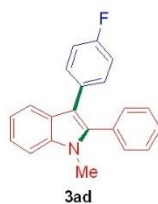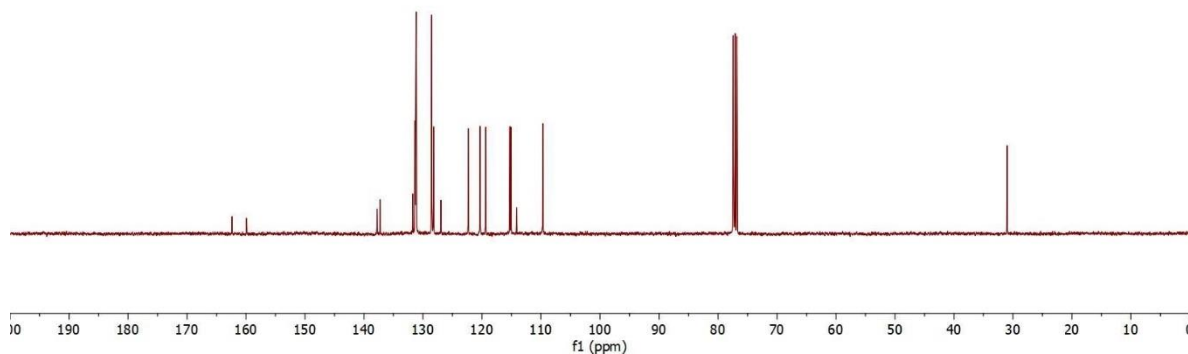

-117.148

(<sup>19</sup>F NMR, 376 MHz, CDCl<sub>3</sub>)

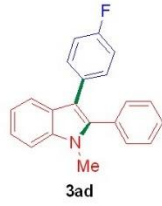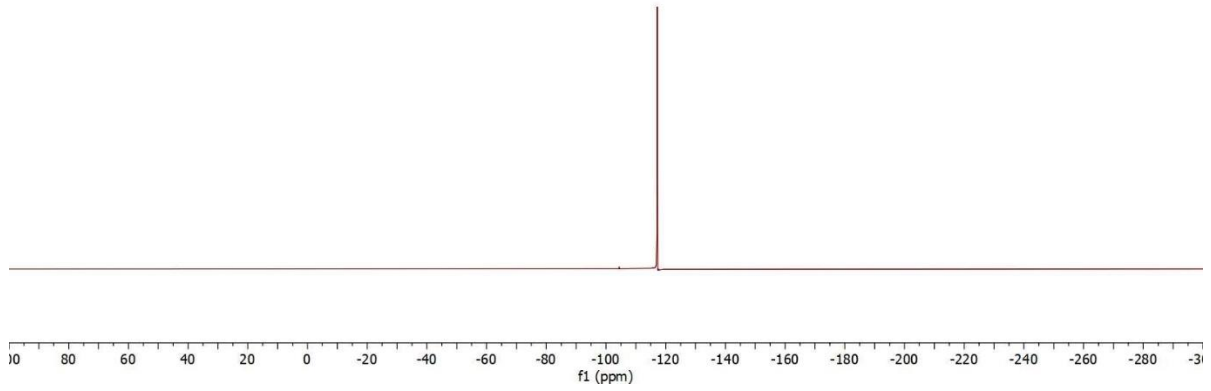

7.750  
7.730  
7.414  
7.392  
7.376  
7.325  
7.306  
7.288  
7.214  
7.176

-3.698

-0.000

(<sup>1</sup>H NMR, 400 MHz, CDCl<sub>3</sub>)

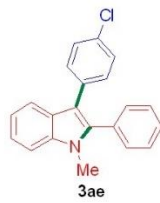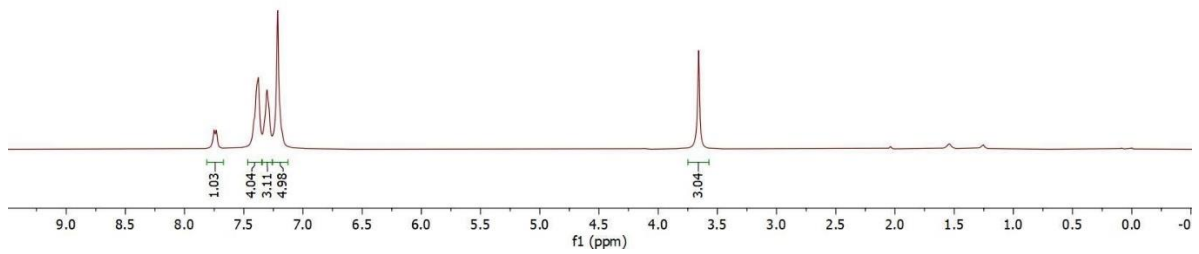

137.98  
137.34  
133.83  
131.62  
131.24  
131.13  
131.05  
128.59  
128.46  
128.31  
126.74  
122.40  
120.47  
119.80  
113.90  
109.76

77.41  
77.10  
76.78

31.00

(<sup>13</sup>C NMR, 100 MHz, CDCl<sub>3</sub>)

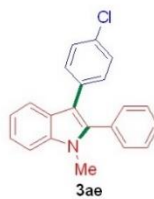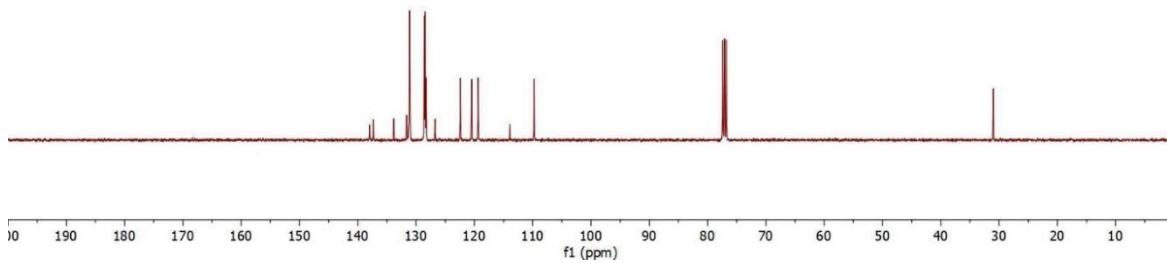

7.752  
7.732  
7.725  
7.604  
7.599  
7.591  
7.585  
7.586  
7.584  
7.583  
7.580  
7.515  
7.507  
7.506  
7.492  
7.442  
7.419  
7.400  
7.181  
7.173  
7.167  
7.161  
7.150  
7.145

3.669

0.000

(<sup>1</sup>H NMR, 400 MHz, CDCl<sub>3</sub>)

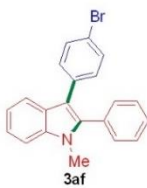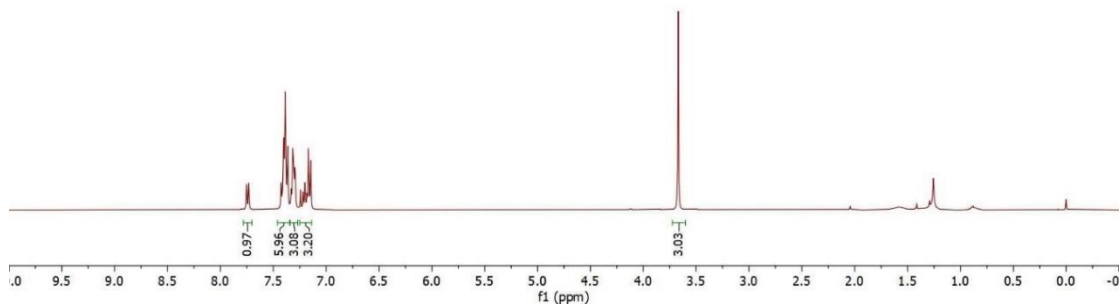

137.99  
137.37  
134.33  
131.61  
131.43  
131.41  
131.14  
128.62  
128.34  
122.43  
120.50  
119.39  
113.91  
109.78

77.42  
77.10  
76.78

31.02

(<sup>13</sup>C NMR, 100 MHz, CDCl<sub>3</sub>)

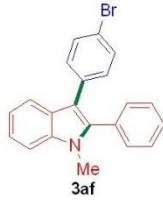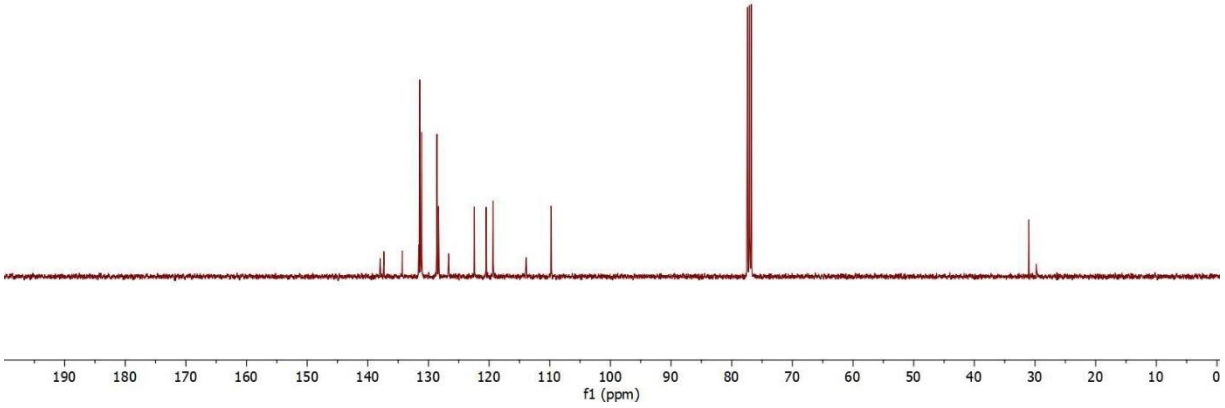

7.810  
7.790  
7.407  
7.386  
7.357  
7.328  
7.312  
7.294  
7.203  
7.182  
7.162  
7.113  
7.056  
7.037  
6.989  
6.970

3.659

2.272

0.000

(<sup>1</sup>H NMR, 400 MHz, CDCl<sub>3</sub>)

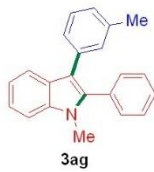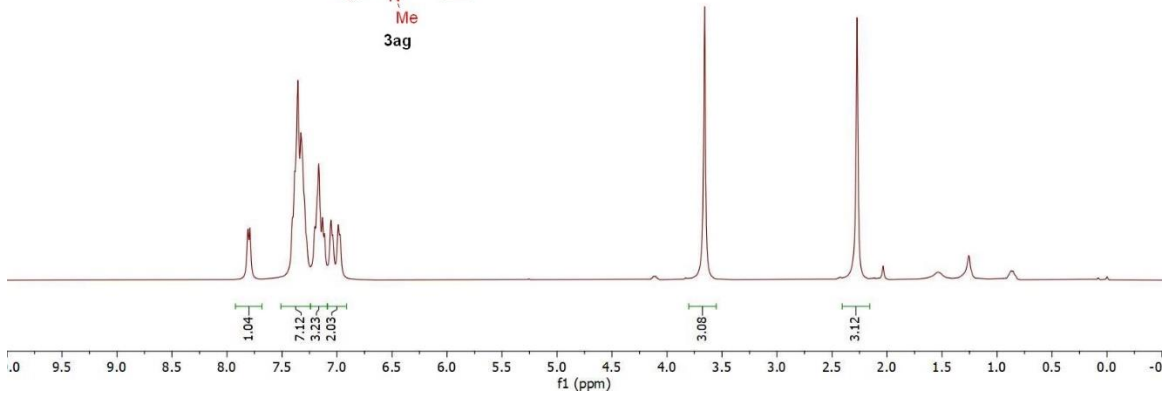

137.75  
137.63  
137.37  
135.14  
132.03  
131.21  
130.61  
128.40  
128.10  
128.03  
127.04  
126.34  
122.18  
120.18  
119.76  
115.18  
109.61

77.41  
77.10  
76.78

30.99

21.58

(<sup>13</sup>C NMR, 100 MHz, CDCl<sub>3</sub>)

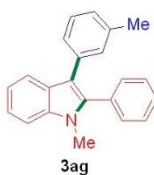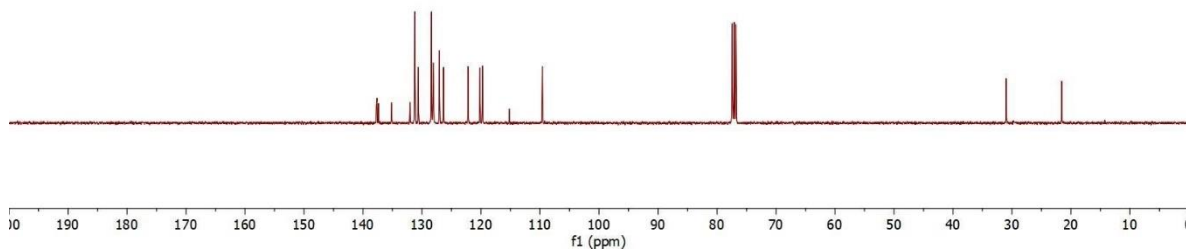

7.877  
7.857  
7.421  
7.400  
7.335  
7.326  
7.323  
7.317  
7.305  
7.300  
7.297  
7.279  
7.276  
7.259  
7.256  
7.253  
7.250  
7.243  
7.236  
7.234  
7.232  
7.225  
7.215  
7.211  
7.207  
7.204  
7.202  
7.187  
7.184  
7.150  
7.147  
7.143  
7.134  
7.129  
7.123  
7.114  
7.110  
7.107  
3.520

2.009

0.000

(<sup>1</sup>H NMR, 400 MHz, CDCl<sub>3</sub>)

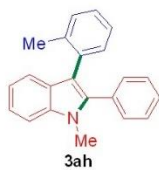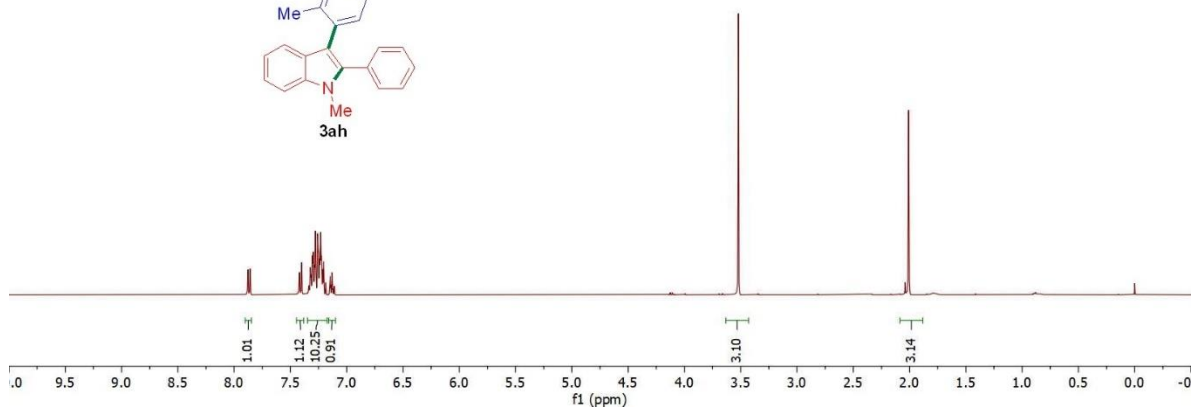

138.04  
137.80  
137.40  
134.53  
132.18  
130.82  
130.51  
129.99  
128.30  
128.00  
127.70  
126.74  
125.40  
122.02  
120.03  
119.87  
115.17  
109.56

77.42  
77.10  
76.78

31.36

20.33

(<sup>13</sup>C NMR, 100 MHz, CDCl<sub>3</sub>)

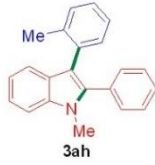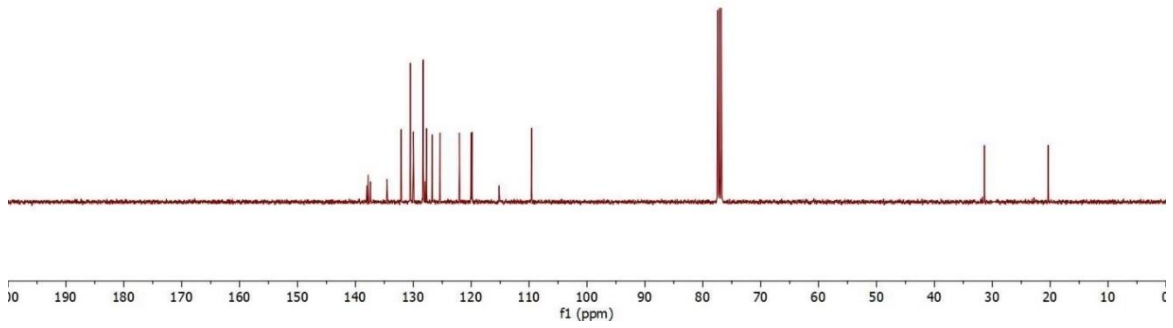

7.746  
7.744  
7.726  
7.724  
7.408  
7.390  
7.387  
7.370  
7.367  
7.351  
7.348  
7.345  
7.323  
7.320  
7.305  
7.302  
7.284  
7.281  
7.264  
7.261  
7.256  
7.248  
7.243  
7.240  
7.211  
7.208  
7.202  
7.198  
7.195  
7.191  
7.189  
7.186  
7.181  
7.178  
6.860  
6.856  
6.831  
6.840  
6.837  
6.834  
3.802  
3.865

0.000

(<sup>1</sup>H NMR, 400 MHz, CDCl<sub>3</sub>)

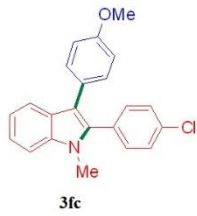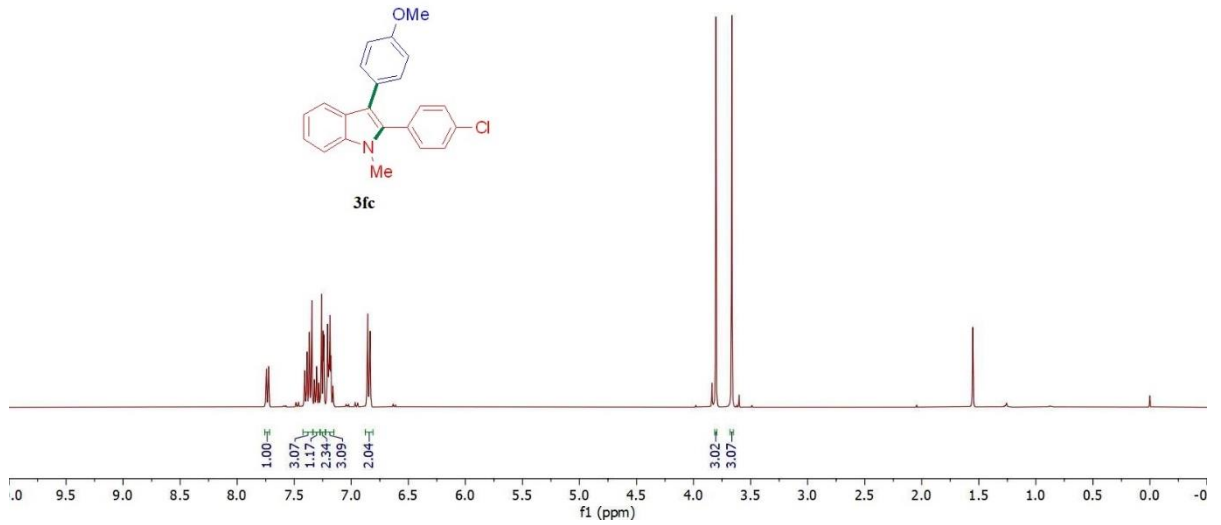



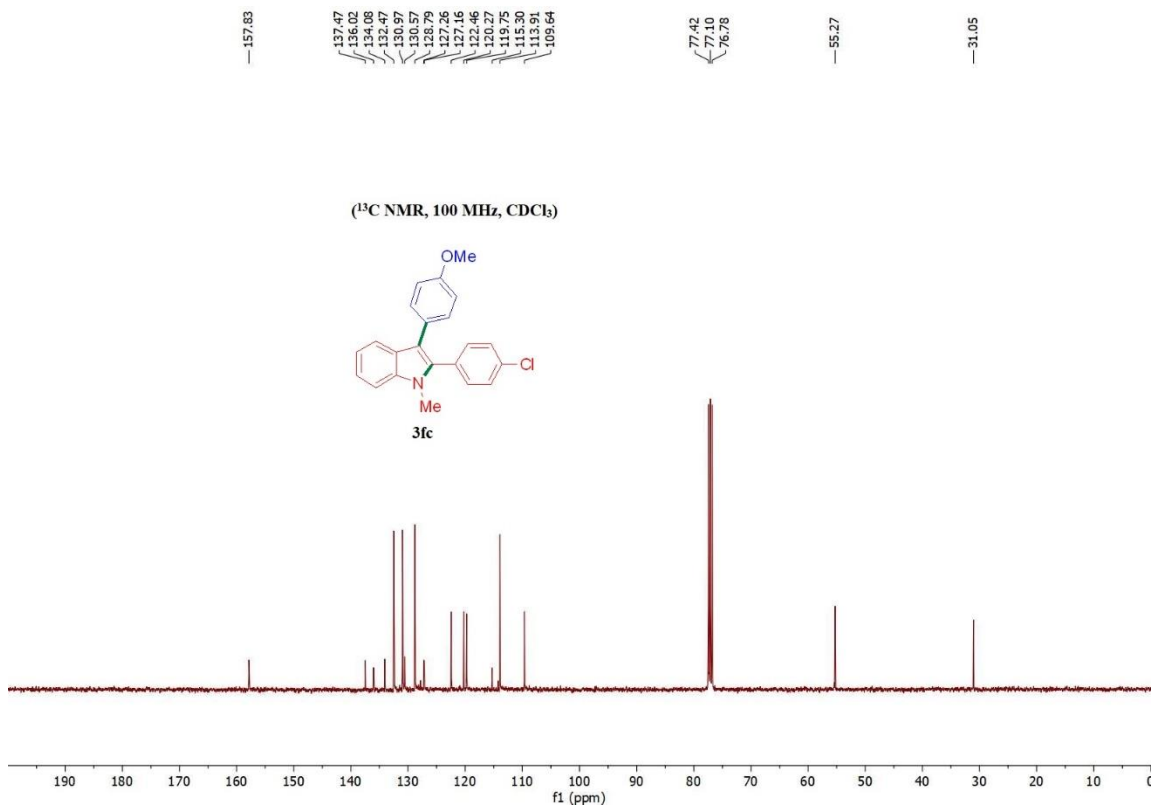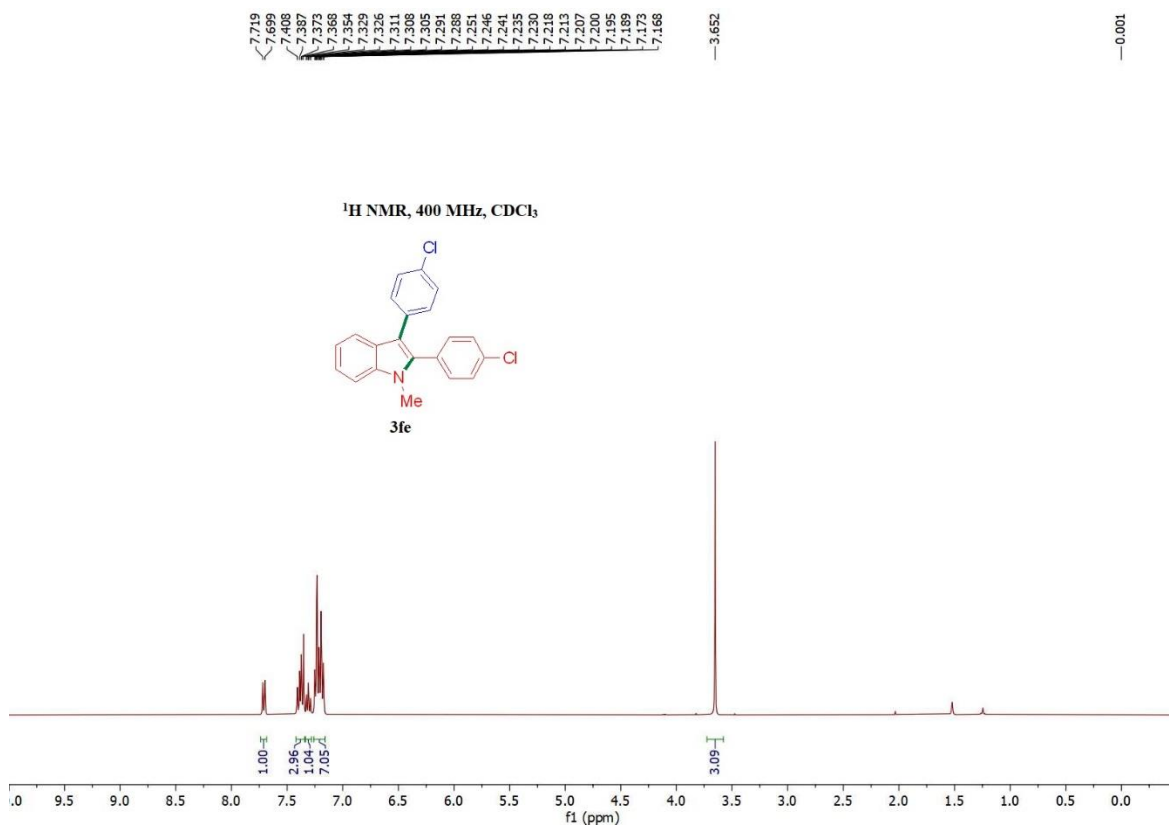

137.49  
136.56  
134.49  
133.50  
132.40  
131.57  
131.09  
130.11  
128.97  
128.64  
126.74  
122.71  
120.64  
119.45  
114.42  
109.81

77.42  
77.10  
76.78

—31.05

<sup>13</sup>C NMR, 100 MHz, CDCl<sub>3</sub>

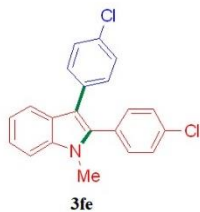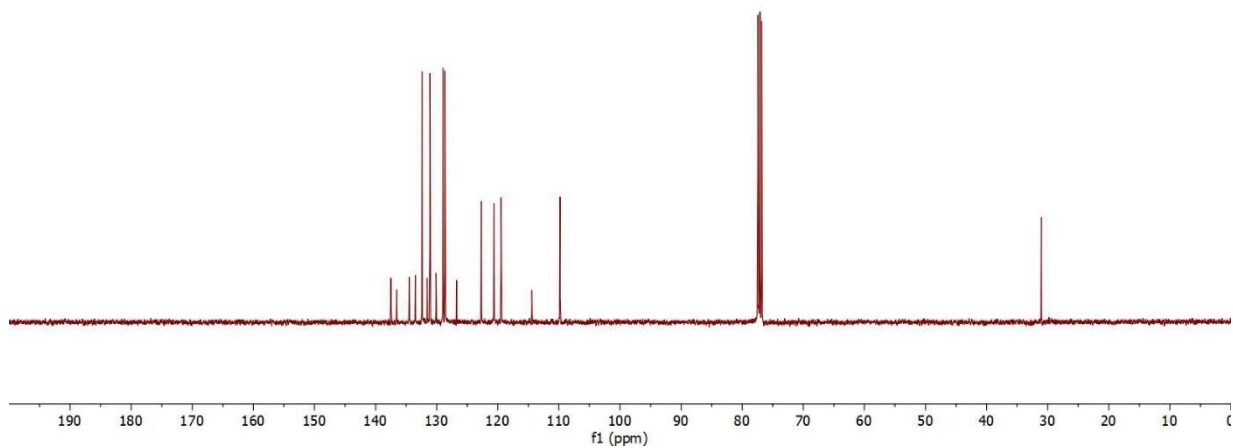

7.961  
7.958  
7.956  
7.951  
7.948  
7.938  
7.936  
7.454  
7.449  
7.444  
7.437  
7.410  
7.401  
7.334  
7.331  
7.327  
7.324  
7.321  
7.317  
7.314  
7.310  
7.296  
7.293  
7.252  
7.249  
7.244  
7.244  
7.236  
7.232  
7.229  
7.215  
7.212  
7.132  
7.129  
7.120  
7.117  
6.977  
6.965  
6.961  
6.957  
6.948  
6.920  
6.916  
6.911  
6.908  
3.614

—0.000

<sup>1</sup>H NMR, 400 MHz, CDCl<sub>3</sub>

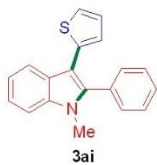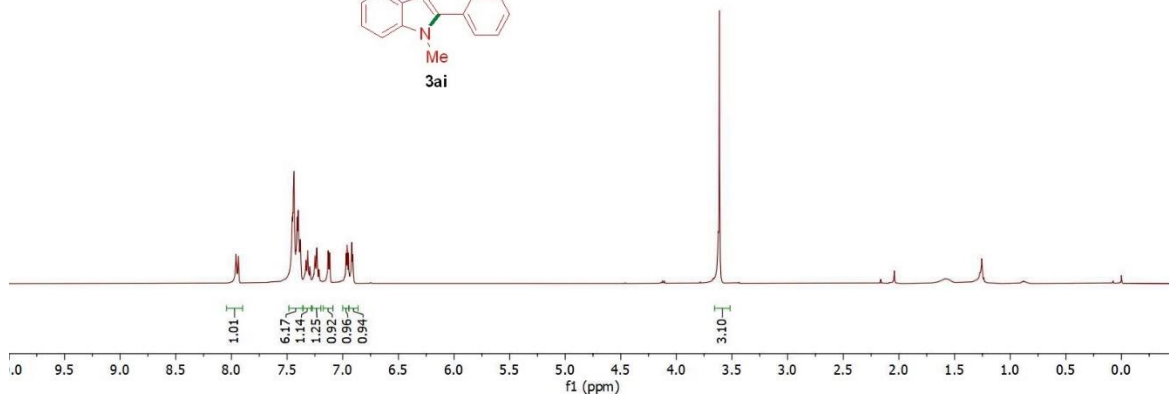

138.36  
137.26  
137.05  
131.71  
131.29  
128.69  
128.58  
126.90  
126.74  
124.80  
123.96  
122.44  
120.53  
119.95  
108.63  
108.51

77.42  
77.10  
76.78

30.95

(<sup>13</sup>C NMR, 100 MHz, CDCl<sub>3</sub>)

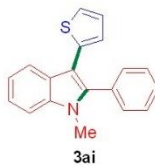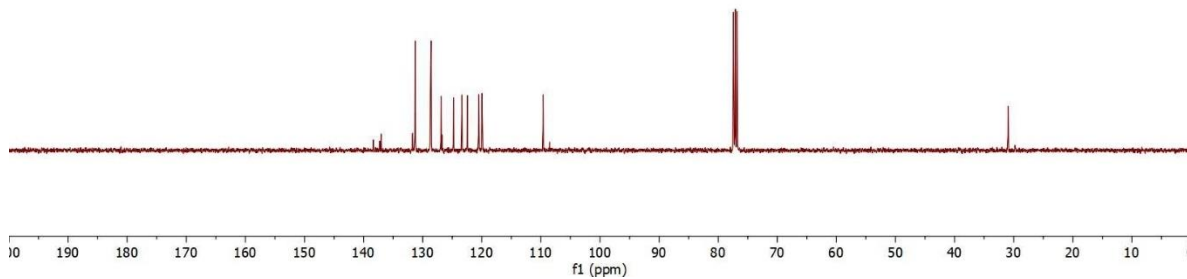

7.607  
7.588  
7.370  
7.365  
7.365  
7.355  
7.354  
7.322  
7.330  
7.304  
7.299  
7.270  
7.268  
7.264  
7.264  
7.248  
7.230  
7.217  
7.203  
7.190  
7.182  
7.179  
7.108  
7.065  
7.080  
7.088  
7.085  
7.070

3.749

2.843  
2.828  
2.819  
2.803  
2.416

1.658  
1.639  
1.635  
1.630  
1.625  
1.610  
1.606  
1.600  
1.594  
1.588  
1.568  
1.402  
1.363  
1.365  
1.317  
1.300  
1.0.900  
1.0.882  
1.0.000

(<sup>1</sup>H NMR, CDCl<sub>3</sub>, 400 MHz)

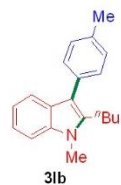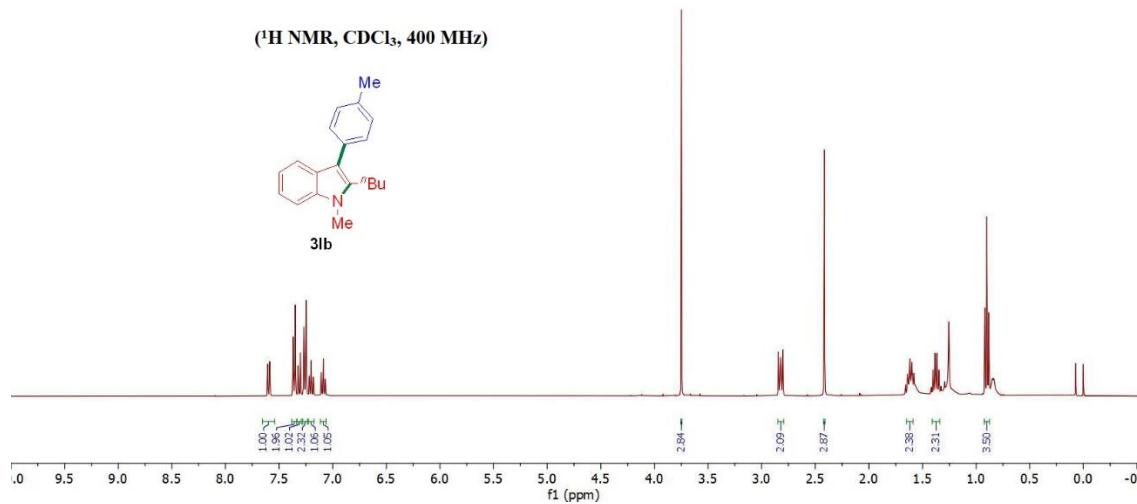

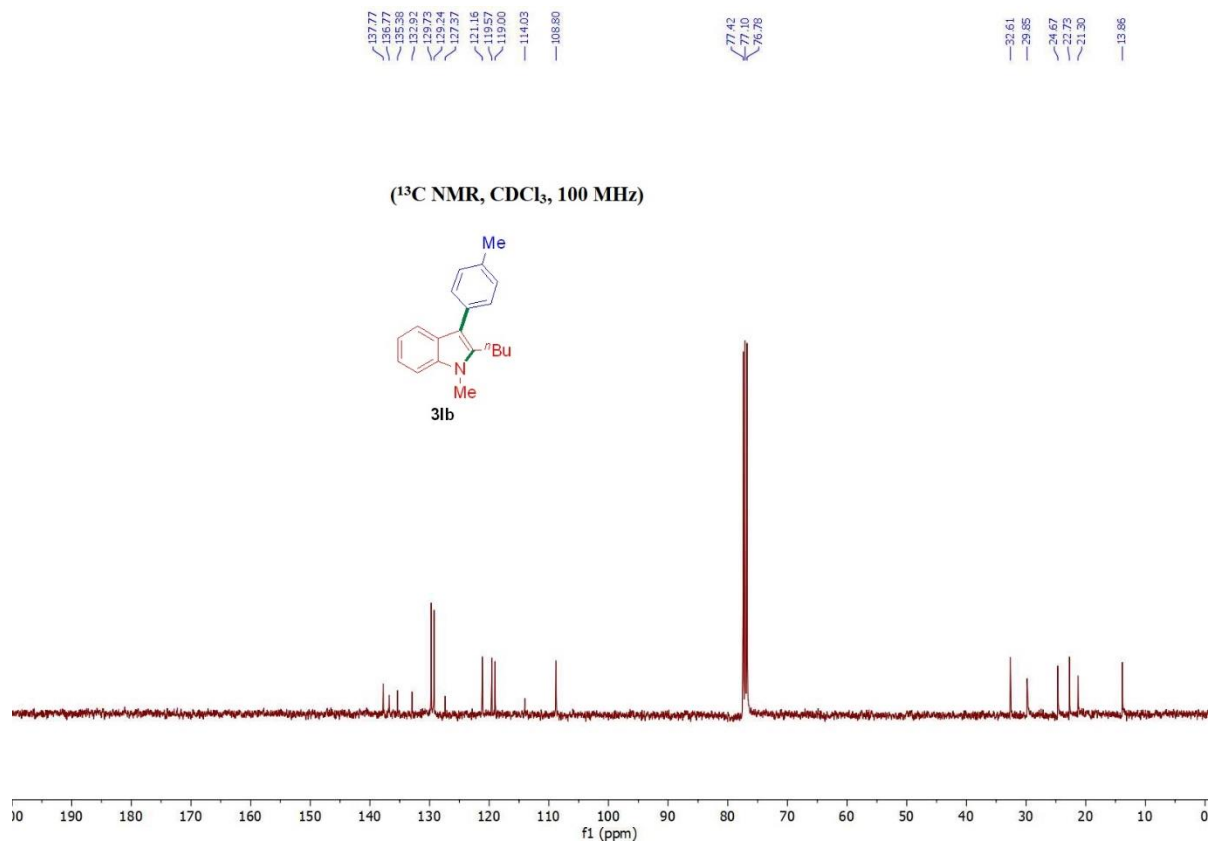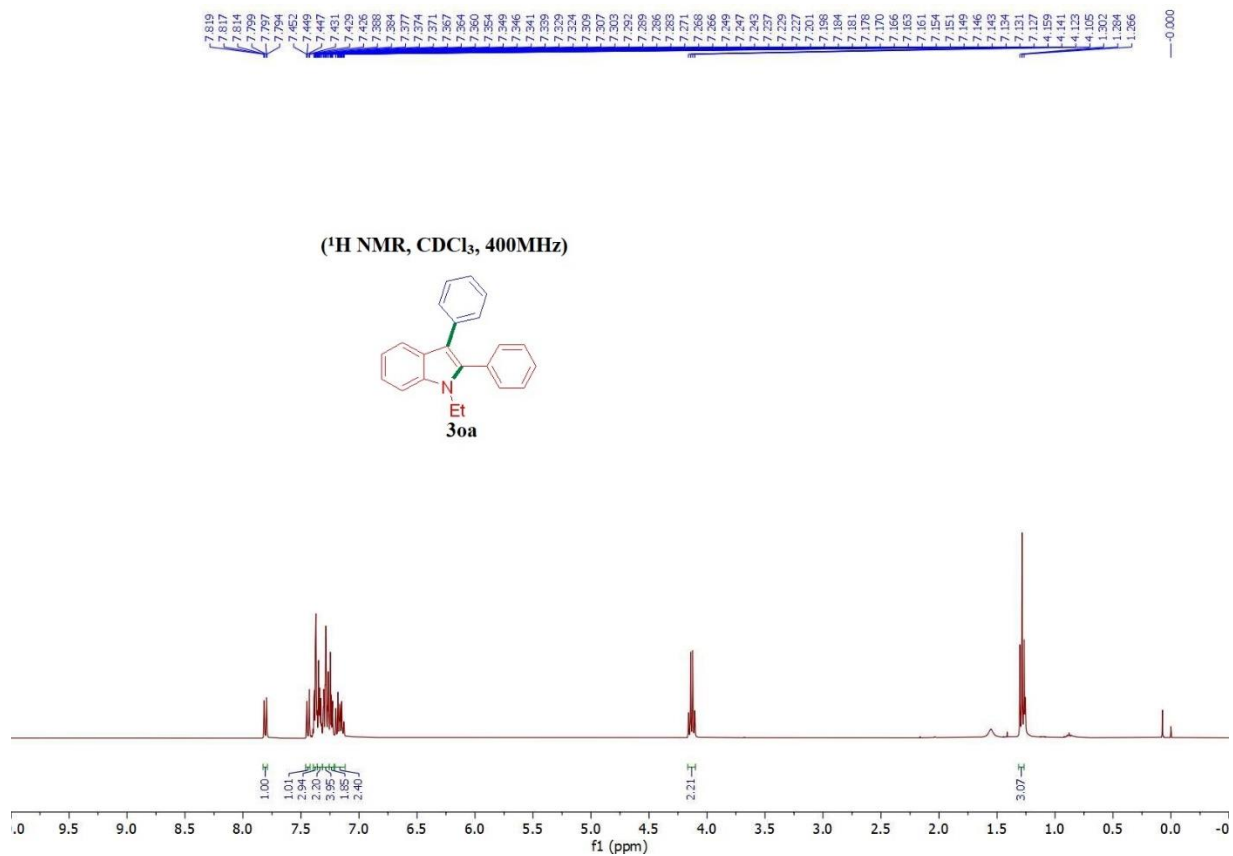

137.35  
136.14  
135.29  
132.22  
131.14  
129.89  
129.70  
128.37  
127.31  
125.47  
122.10  
120.16  
119.83  
115.76  
109.86

77.42  
77.10  
76.78

38.71

15.47

(<sup>13</sup>C NMR, CDCl<sub>3</sub>, 100MHz)

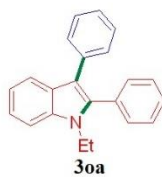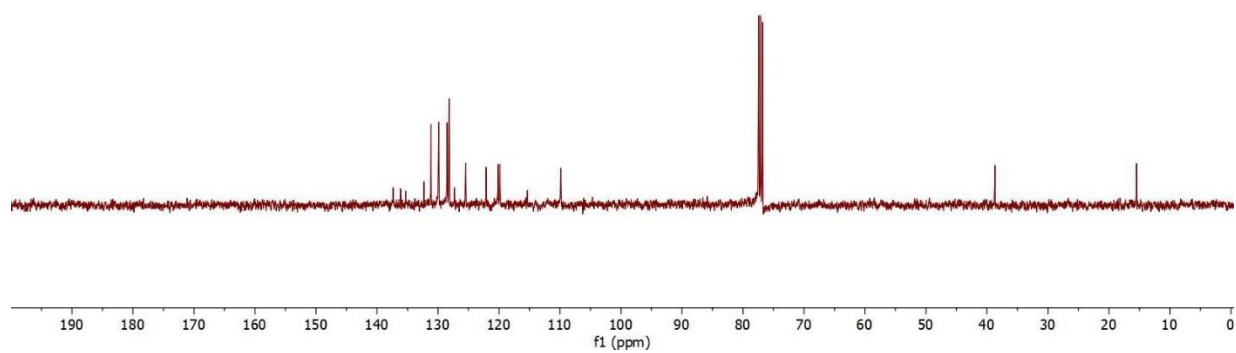

Supplement: d3ob00961k1.pdf [file d3ob00961k1.pdf]
